# Supplementary material for: CaMKII autophosphorylation can occur between holoenzymes without subunit exchange
Source: eLife journal article supplement (doi:10.7554/elife.86090), 2023-08-11
Supplement: supp1 [file elife-86090-supp1-v3.pdf]

## Supplementary File 1A

| Homotypic crosslinks (basal, 30 min) |                                               |          |            |                     |
|--------------------------------------|-----------------------------------------------|----------|------------|---------------------|
| #                                    | Peptide                                       | domain_a | domain_b   | crosslinked lysines |
| 1                                    | AGAYDFPSPEWDTVTPEAKDLINK(19)-NFSGGKSGGNK(6)   | kinase   | linker     | 245-317             |
| 2                                    | CVKVLAGEYAAK(3)-LLKHPNIVR(3)                  | kinase   | kinase     | 32-68               |
| 3                                    | DGKWQIVHFHR(3)-DHQKLER(4)                     | hub      | kinase     | 461-56              |
| 4                                    | DGKWQIVHFHR(3)-KQEIIK(1)                      | hub      | hub        | 461-347             |
| 5                                    | DGKWQIVHFHR(3)-KSDGVK(1)                      | hub      | linker     | 461-323             |
| 6                                    | DHQKLER(4)-DHQKLER(4)                         | kinase   | kinase     | 56-56               |
| 7                                    | DHQKLER(4)-IINTKK(5)                          | kinase   | kinase     | 56-47               |
| 8                                    | DHQKLER(4)-KSDGVK(1)                          | kinase   | linker     | 56-323              |
| 9                                    | DHQKLER(4)-LKGAAVK(2)                         | kinase   | kinase     | 56-148              |
| 10                                   | DLINKMLTINPSK(5)-DHQKLER(4)                   | kinase   | kinase     | 250-56              |
| 11                                   | DLINKMLTINPSK(5)-DLKPENLLLASK(3)              | kinase   | kinase     | 250-137             |
| 12                                   | DLINKMLTINPSK(5)-KQEIIK(1)                    | kinase   | hub        | 250-347             |
| 13                                   | DLINKMLTINPSK(5)-LKGAAVK(2)                   | kinase   | kinase     | 250-148             |
| 14                                   | DLINKMLTINPSK(5)-MLTINPSKR(8)                 | kinase   | kinase     | 250-258             |
| 15                                   | DLKPENLLLASK(3)-DHQKLER(4)                    | kinase   | kinase     | 137-56              |
| 16                                   | DLKPENLLLASK(3)-DLKPENLLLASK(3)               | kinase   | kinase     | 137-137             |
| 17                                   | DLKPENLLLASK(3)-KSDGVK(1)                     | kinase   | linker     | 137-323             |
| 18                                   | DLKPENLLLASK(3)-LKGAAVK(2)                    | kinase   | kinase     | 137-148             |
| 19                                   | DLKPENLLLASK(3)-LLKHPNIVR(3)                  | kinase   | kinase     | 137-68              |
| 20                                   | DLKPENLLLASK(3)-MLTINPSKR(8)                  | kinase   | kinase     | 137-258             |
| 21                                   | DLKPENLLLASK(3)-NFSGGKSGGNK(6)                | kinase   | linker     | 137-317             |
| 22                                   | DLKPENLLLASKLK(12)-DHQKLER(4)                 | kinase   | kinase     | 146-56              |
| 23                                   | DLKPENLLLASKLK(12)-IINTKK(5)                  | kinase   | kinase     | 146-47              |
| 24                                   | DLKPENLLLASKLK(12)-KSDGVK(1)                  | kinase   | linker     | 146-323             |
| 25                                   | DLKPENLLLASKLK(12)-LKGAAVK(2)                 | kinase   | kinase     | 146-148             |
| 26                                   | DLKPENLLLASKLK(12)-LLKHPNIVR(3)               | kinase   | kinase     | 146-68              |
| 27                                   | DLKPENLLLASKLK(12)-MLTINPSKR(8)               | kinase   | kinase     | 146-258             |
| 28                                   | DLKPENLLLASKLK(12)-NFSGGKSGGNK(6)             | kinase   | linker     | 146-317             |
| 29                                   | ESSESTNTTIEDEDTKVR(16)-DGKWQIVHFHR(3)         | linker   | hub        | 344-461             |
| 30                                   | ESSESTNTTIEDEDTKVR(16)-DHQKLER(4)             | hub      | kinase     | 344-56              |
| 31                                   | ESSESTNTTIEDEDTKVR(16)-ESSESTNTTIEDEDTKVR(16) | hub      | hub        | 344-344             |
| 32                                   | ESSESTNTTIEDEDTKVR(16)-KQEIIK(1)              | hub      | hub        | 344-347             |
| 33                                   | ESSESTNTTIEDEDTKVR(16)-KSDGVK(1)              | hub      | linker     | 344-323             |
| 34                                   | ESSESTNTTIEDEDTKVR(16)-LKGAAVK(2)             | hub      | kinase     | 344-148             |
| 35                                   | ESSESTNTTIEDEDTKVR(16)-LKGAILTTMLATR(2)       | hub      | regulatory | 344-300             |

|    |                                                       |            |            |         |
|----|-------------------------------------------------------|------------|------------|---------|
| 36 | ESSESTNTTIEDEDTKVR(16)-LLKHPNIVR(3)                   | hub        | kinase     | 344-68  |
| 37 | ESSESTNTTIEDEDTKVR(16)-MLTINPSKR(8)                   | hub        | kinase     | 344-258 |
| 38 | ESSESTNTTIEDEDTKVR(16)-NFSGGKSGGNK(6)                 | hub        | linker     | 344-317 |
| 39 | ESSESTNTTIEDEDTKVRK(16)-KQEIIK(1)                     | hub        | hub        | 344-347 |
| 40 | FTEEYQLFEELGKGAFSVVR(13)-DGKWQIVHFHR(3)               | kinase     | hub        | 21-461  |
| 41 | FTEEYQLFEELGKGAFSVVR(13)-DHQKLER(4)                   | kinase     | kinase     | 21-56   |
| 42 | FTEEYQLFEELGKGAFSVVR(13)-DLKPENLLLASK(3)              | kinase     | kinase     | 21-137  |
| 43 | FTEEYQLFEELGKGAFSVVR(13)-DLKPENLLLASKLK(12)           | kinase     | kinase     | 21-146  |
| 44 | FTEEYQLFEELGKGAFSVVR(13)-IINTKK(5)                    | kinase     | kinase     | 21-47   |
| 45 | FTEEYQLFEELGKGAFSVVR(13)-KSDGVK(1)                    | kinase     | linker     | 21-323  |
| 46 | FTEEYQLFEELGKGAFSVVR(13)-LKGAILTTMLATR(2)             | kinase     | regulatory | 21-300  |
| 47 | FTEEYQLFEELGKGAFSVVR(13)-MLTINPSKR(8)                 | kinase     | kinase     | 21-258  |
| 48 | FTEEYQLFEELGKGAFSVVR(13)-NFSGGKSGGNK(6)               | kinase     | linker     | 21-317  |
| 49 | FTEEYQLFEELGKGAFSVVR(13)-VLAGQEYAAKIINTK(10)          | kinase     | kinase     | 21-42   |
| 50 | FTEEYQLFEELGKGAFSVVRR(13)-IINTKKLSAR(5)               | kinase     | kinase     | 21-47   |
| 51 | GAAVKLADFLAIEVEGEQQAWFGFAGTPGYLSPEVLR(5)-LLKHPNIVR(3) | kinase     | kinase     | 153-68  |
| 52 | ITAAEALKHPWISHR(8)-DHQKLER(4)                         | kinase     | kinase     | 267-56  |
| 53 | ITAAEALKHPWISHR(8)-DLINKMLTINPSK(5)                   | kinase     | kinase     | 267-250 |
| 54 | ITAAEALKHPWISHR(8)-DLKPENLLLASK(3)                    | kinase     | kinase     | 267-137 |
| 55 | ITAAEALKHPWISHR(8)-KQEIIK(1)                          | kinase     | hub        | 267-347 |
| 56 | ITAAEALKHPWISHR(8)-KSDGVK(1)                          | kinase     | linker     | 267-323 |
| 57 | KLKGAILTTMLATR(3)-KLKGAILTTMLATR(1)                   | regulatory | regulatory | 300-298 |
| 58 | KQEIIK(1)-IINTKK(5)                                   | hub        | kinase     | 347-47  |
| 59 | KQEIIK(1)-KQEIIK(1)                                   | hub        | hub        | 347-347 |
| 60 | KQEIIK(1)-KSDGVK(1)                                   | hub        | linker     | 347-323 |
| 61 | KQEIIK(1)-LKGAAVK(2)                                  | hub        | kinase     | 347-148 |
| 62 | KSDGVKESSESTNTTIEDEDTK(1)-MLTINPSKR(8)                | linker     | kinase     | 323-258 |
| 63 | KSDGVKESSESTNTTIEDEDTK(1)-NFSGGKSGGNK(6)              | linker     | linker     | 323-317 |
| 64 | KSDGVKESSESTNTTIEDEDTK(6)-MLTINPSKR(8)                | linker     | kinase     | 328-258 |
| 65 | KSDGVKESSESTNTTIEDEDTK(6)-NFSGGKSGGNK(6)              | linker     | linker     | 328-317 |
| 66 | LKGAILTTMLATR(2)-DHQKLER(4)                           | regulatory | kinase     | 300-56  |
| 67 | LKGAILTTMLATR(2)-DLKPENLLLASK(3)                      | regulatory | kinase     | 300-137 |
| 68 | LKGAILTTMLATR(2)-KQEIIK(1)                            | regulatory | hub        | 300-347 |
| 69 | LKGAILTTMLATR(2)-KSDGVK(1)                            | regulatory | linker     | 300-323 |
| 70 | LKGAILTTMLATR(2)-LKGAAVK(2)                           | regulatory | kinase     | 300-148 |
| 71 | LKGAILTTMLATR(2)-LKGAILTTMLATR(2)                     | regulatory | regulatory | 300-300 |
| 72 | LKGAILTTMLATR(2)-MLTINPSKR(8)                         | regulatory | kinase     | 300-258 |

|     |                                                    |            |            |         |
|-----|----------------------------------------------------|------------|------------|---------|
| 73  | LKGAILTTMLATR(2)-NFSGGKSGGNK(6)                    | regulatory | linker     | 300-317 |
| 74  | LKGAILTTMLATR(2)-QETVDCLKK(8)                      | regulatory | regulatory | 300-291 |
| 75  | LLKHPNIVR(3)-DHQKLER(4)                            | kinase     | kinase     | 68-56   |
| 76  | LLKHPNIVR(3)-LKGA AVK(2)                           | kinase     | kinase     | 68-148  |
| 77  | LYQQIKAGAYDFPSPEWDTVPEAK(6)-DGKWQIVHFHR(3)         | kinase     | hub        | 226-461 |
| 78  | LYQQIKAGAYDFPSPEWDTVPEAK(6)-DHQKLER(4)             | kinase     | kinase     | 226-56  |
| 79  | LYQQIKAGAYDFPSPEWDTVPEAK(6)-DLKPENLLASKLK(12)      | kinase     | kinase     | 226-146 |
| 80  | LYQQIKAGAYDFPSPEWDTVPEAK(6)-ITAAEALKHPWISHR(8)     | kinase     | kinase     | 226-267 |
| 81  | LYQQIKAGAYDFPSPEWDTVPEAK(6)-KQEIIK(1)              | kinase     | hub        | 226-347 |
| 82  | LYQQIKAGAYDFPSPEWDTVPEAK(6)-KSDGVK(1)              | kinase     | linker     | 226-323 |
| 83  | LYQQIKAGAYDFPSPEWDTVPEAK(6)-LKGA AVK(2)            | kinase     | kinase     | 226-148 |
| 84  | LYQQIKAGAYDFPSPEWDTVPEAK(6)-LKGAILTTMLATR(2)       | kinase     | regulatory | 226-300 |
| 85  | LYQQIKAGAYDFPSPEWDTVPEAK(6)-LLKHPNIVR(3)           | kinase     | kinase     | 226-68  |
| 86  | LYQQIKAGAYDFPSPEWDTVPEAK(6)-MLTINPSKR(8)           | kinase     | kinase     | 226-258 |
| 87  | LYQQIKAGAYDFPSPEWDTVPEAK(6)-NFSGGKSGGNK(6)         | kinase     | linker     | 226-317 |
| 88  | LYQQIKAGAYDFPSPEWDTVPEAK(6)-SDGVKESSESTNTTIEDTK(5) | kinase     | linker     | 226-328 |
| 89  | LYQQIKAGAYDFPSPEWDTVPEAK(6)-VLAGQEYAAKIINTK(10)    | kinase     | kinase     | 226-42  |
| 90  | MLTINPSKR(8)-DHQKLER(4)                            | kinase     | kinase     | 258-56  |
| 91  | MLTINPSKR(8)-IINTKK(5)                             | kinase     | kinase     | 258-47  |
| 92  | MLTINPSKR(8)-KQEIIK(1)                             | kinase     | hub        | 258-347 |
| 93  | MLTINPSKR(8)-KSDGVK(1)                             | kinase     | linker     | 258-323 |
| 94  | MLTINPSKR(8)-LKGA AVK(2)                           | kinase     | kinase     | 258-148 |
| 95  | MLTINPSKR(8)-MLTINPSKR(8)                          | kinase     | kinase     | 258-258 |
| 96  | MLTINPSKR(8)-NFSGGKSGGNK(6)                        | kinase     | linker     | 258-317 |
| 97  | NFSGGKSGGNK(6)-KQEIIK(1)                           | linker     | hub        | 317-347 |
| 98  | NFSGGKSGGNK(6)-KSDGVK(1)                           | linker     | linker     | 317-323 |
| 99  | NFSGGKSGGNK(6)-LKGA AVK(2)                         | linker     | kinase     | 317-148 |
| 100 | NFSGGKSGGNK(6)-NFSGGKSGGNK(6)                      | linker     | linker     | 317-317 |
| 101 | NSKPVHTTILNPHIHLMGDESACIAYIR(3)-DHQKLER(4)         | hub        | kinase     | 408-56  |
| 102 | QETVDCLKK(8)-DHQKLER(4)                            | regulatory | kinase     | 291-56  |
| 103 | QETVDCLKK(8)-KQEIIK(1)                             | regulatory | hub        | 291-347 |
| 104 | QETVDCLKK(8)-KSDGVK(1)                             | regulatory | linker     | 291-323 |
| 105 | QETVDCLKK(8)-LLKHPNIVR(3)                          | regulatory | kinase     | 291-68  |
| 106 | QETVDCLKK(8)-NFSGGKSGGNK(6)                        | regulatory | linker     | 291-317 |
| 107 | RDGWQIVHFHR(4)-SGGNKSDGVK(5)                       | hub        | linker     | 461-322 |
| 108 | RITAAEALKHPWISHR(9)-DLINKMLTINPSKR(13)             | kinase     | kinase     | 267-258 |
| 109 | RITAAEALKHPWISHR(9)-DLINKMLTINPSKR(5)              | kinase     | kinase     | 267-250 |

|     |                                                 |            |            |         |
|-----|-------------------------------------------------|------------|------------|---------|
| 110 | RKLLGAILTTMLATR(2)-VLAGQEYAAKIINTK(10)          | regulatory | kinase     | 298-42  |
| 111 | RKLLGAILTTMLATR(4)-KSDGVK(1)                    | regulatory | linker     | 300-323 |
| 112 | SDGVKESSESTNTTIEDEDTK(5)-DGKWQIVHFHR(3)         | linker     | hub        | 328-461 |
| 113 | SDGVKESSESTNTTIEDEDTK(5)-DHQKLER(4)             | linker     | kinase     | 328-56  |
| 114 | SDGVKESSESTNTTIEDEDTK(5)-DLKPENLLLASKLK(12)     | linker     | kinase     | 328-146 |
| 115 | SDGVKESSESTNTTIEDEDTK(5)-ESSESTNTTIEDEDTKVR(16) | linker     | linker     | 328-344 |
| 116 | SDGVKESSESTNTTIEDEDTK(5)-IINTKK(5)              | linker     | kinase     | 328-47  |
| 117 | SDGVKESSESTNTTIEDEDTK(5)-ITAAEALKHPWISHR(8)     | linker     | kinase     | 328-267 |
| 118 | SDGVKESSESTNTTIEDEDTK(5)-KQEIIK(1)              | linker     | hub        | 328-347 |
| 119 | SDGVKESSESTNTTIEDEDTK(5)-LKGAILTTMLATR(2)       | linker     | regulatory | 328-300 |
| 120 | SDGVKESSESTNTTIEDEDTK(5)-LLKHPNIVR(3)           | linker     | kinase     | 328-68  |
| 121 | SDGVKESSESTNTTIEDEDTK(5)-MLTINPSKR(8)           | linker     | kinase     | 328-258 |
| 122 | SDGVKESSESTNTTIEDEDTK(5)-NFSGGKSGGNK(6)         | linker     | linker     | 328-317 |
| 123 | SDGVKESSESTNTTIEDEDTK(5)-RKLLGAILTTMLATR(2)     | linker     | regulatory | 328-298 |
| 124 | SDGVKESSESTNTTIEDEDTK(5)-VLAGQEYAAKIINTK(10)    | linker     | kinase     | 328-42  |
| 125 | VLAGQEYAAKIINTK(10)-DHQKLER(4)                  | kinase     | kinase     | 42-56   |
| 126 | VLAGQEYAAKIINTK(10)-DLKPENLLLASKLK(3)           | kinase     | kinase     | 42-137  |
| 127 | VLAGQEYAAKIINTK(10)-DLKPENLLLASKLK(12)          | kinase     | kinase     | 42-146  |
| 128 | VLAGQEYAAKIINTK(10)-IINTKK(5)                   | kinase     | kinase     | 42-47   |
| 129 | VLAGQEYAAKIINTK(10)-KSDGVK(1)                   | kinase     | linker     | 42-323  |
| 130 | VLAGQEYAAKIINTK(10)-LKGAAVK(2)                  | kinase     | kinase     | 42-148  |
| 131 | VLAGQEYAAKIINTK(10)-LKGAILTTMLATR(2)            | kinase     | regulatory | 42-300  |
| 132 | VLAGQEYAAKIINTK(10)-LLKHPNIVR(3)                | kinase     | kinase     | 42-68   |
| 133 | VLAGQEYAAKIINTK(10)-MLTINPSKR(8)                | kinase     | kinase     | 42-258  |
| 134 | VLAGQEYAAKIINTK(10)-NFSGGKSGGNK(6)              | kinase     | linker     | 42-317  |
| 135 | VLAGQEYAAKIINTK(10)-VLAGQEYAAKIINTK(10)         | kinase     | kinase     | 42-42   |
| 136 | VLAGQEYAAKIINTKK(10)-DHQKLER(4)                 | kinase     | kinase     | 42-56   |

## Homotypic crosslinks (basal, 150 min)

| #  | Peptide                                        | domain_a | domain_b   | crosslinked lysines |
|----|------------------------------------------------|----------|------------|---------------------|
| 1  | AGAYDFPSPEWDTVPEAKDLINK(19)-DHQKLER(4)         | kinase   | kinase     | 245-56              |
| 2  | AGAYDFPSPEWDTVPEAKDLINK(19)-DLKPENLLLASK(3)    | kinase   | kinase     | 245-137             |
| 3  | AGAYDFPSPEWDTVPEAKDLINK(19)-IINTKK(5)          | kinase   | kinase     | 245-47              |
| 4  | AGAYDFPSPEWDTVPEAKDLINK(19)-ITAAEALKHPWISHR(8) | kinase   | kinase     | 245-267             |
| 5  | AGAYDFPSPEWDTVPEAKDLINK(19)-KSDGVK(1)          | kinase   | linker     | 245-323             |
| 6  | AGAYDFPSPEWDTVPEAKDLINK(19)-LKGAAVK(2)         | kinase   | kinase     | 245-148             |
| 7  | AGAYDFPSPEWDTVPEAKDLINK(19)-LLKHPNIVR(3)       | kinase   | kinase     | 245-68              |
| 8  | AGAYDFPSPEWDTVPEAKDLINK(19)-MLTINPSKR(8)       | kinase   | kinase     | 245-258             |
| 9  | AGAYDFPSPEWDTVPEAKDLINK(19)-NFSGGKSGGNK(6)     | kinase   | linker     | 245-317             |
| 10 | CVKVLAGEYAAK(3)-DHQKLER(4)                     | kinase   | kinase     | 32-56               |
| 11 | DGKWQIVHFHR(3)-KQEIIK(1)                       | hub      | hub        | 461-347             |
| 12 | DGKWQIVHFHR(3)-KSDGVK(1)                       | hub      | linker     | 461-323             |
| 13 | DHQKLER(4)-DHQKLER(4)                          | kinase   | kinase     | 56-56               |
| 14 | DHQKLER(4)-IINTKK(5)                           | kinase   | kinase     | 56-47               |
| 15 | DHQKLER(4)-KQEIIK(1)                           | kinase   | hub        | 56-347              |
| 16 | DHQKLER(4)-KSDGVK(1)                           | kinase   | linker     | 56-323              |
| 17 | DHQKLER(4)-LKGAAVK(2)                          | kinase   | kinase     | 56-148              |
| 18 | DLINKMLTINPSK(5)-DHQKLER(4)                    | kinase   | kinase     | 250-56              |
| 19 | DLINKMLTINPSK(5)-IINTKK(5)                     | kinase   | kinase     | 250-47              |
| 20 | DLINKMLTINPSK(5)-KQEIIK(1)                     | kinase   | hub        | 250-347             |
| 21 | DLINKMLTINPSK(5)-KSDGVK(1)                     | kinase   | linker     | 250-323             |
| 22 | DLINKMLTINPSK(5)-LKGAAVK(2)                    | kinase   | kinase     | 250-148             |
| 23 | DLINKMLTINPSK(5)-MLTINPSKR(8)                  | kinase   | kinase     | 250-258             |
| 24 | DLINKMLTINPSK(5)-NFSGGKSGGNK(6)                | kinase   | linker     | 250-317             |
| 25 | DLKPENLLLASK(3)-DHQKLER(4)                     | kinase   | kinase     | 137-56              |
| 26 | DLKPENLLLASK(3)-DLKPENLLLASK(3)                | kinase   | kinase     | 137-137             |
| 27 | DLKPENLLLASK(3)-IINTKK(5)                      | kinase   | kinase     | 137-47              |
| 28 | DLKPENLLLASK(3)-KSDGVK(1)                      | kinase   | linker     | 137-323             |
| 29 | DLKPENLLLASK(3)-LKGAAVK(2)                     | kinase   | kinase     | 137-148             |
| 30 | DLKPENLLLASK(3)-MLTINPSKR(8)                   | kinase   | kinase     | 137-258             |
| 31 | DLKPENLLLASK(3)-NFSGGKSGGNK(6)                 | kinase   | linker     | 137-317             |
| 32 | DLKPENLLLASK(3)-QETVDCLKK(8)                   | kinase   | regulatory | 137-291             |
| 33 | DLKPENLLLASKLK(12)-DHQKLER(4)                  | kinase   | kinase     | 146-56              |
| 34 | DLKPENLLLASKLK(12)-DLKPENLLLASKLK(12)          | kinase   | kinase     | 146-146             |
| 35 | DLKPENLLLASKLK(12)-LKGAAVK(2)                  | kinase   | kinase     | 146-148             |

|    |                                                        |        |            |         |
|----|--------------------------------------------------------|--------|------------|---------|
| 36 | DLKPENLLLASKLK(12)-MLTINPSKR(8)                        | kinase | kinase     | 146-258 |
| 37 | DLKPENLLLASKLK(12)-NFSGGKSGGNK(6)                      | kinase | linker     | 146-317 |
| 38 | ESSESTNTTIEDEDTKVR(16)-DHQKLER(4)                      | hub    | kinase     | 344-56  |
| 39 | ESSESTNTTIEDEDTKVR(16)-DLKPENLLLASKLK(12)              | hub    | kinase     | 344-146 |
| 40 | ESSESTNTTIEDEDTKVR(16)-ESSESTNTTIEDEDTKVR(16)          | hub    | hub        | 344-344 |
| 41 | ESSESTNTTIEDEDTKVR(16)-ITAAEALKHPWISHR(8)              | hub    | kinase     | 344-267 |
| 42 | ESSESTNTTIEDEDTKVR(16)-KQEIIK(1)                       | hub    | hub        | 344-347 |
| 43 | ESSESTNTTIEDEDTKVR(16)-KSDGVK(1)                       | hub    | linker     | 344-323 |
| 44 | ESSESTNTTIEDEDTKVR(16)-LKGAAVK(2)                      | hub    | kinase     | 344-148 |
| 45 | ESSESTNTTIEDEDTKVR(16)-LKGAILTTLATR(2)                 | hub    | regulatory | 344-300 |
| 46 | ESSESTNTTIEDEDTKVR(16)-MLTINPSKR(8)                    | hub    | kinase     | 344-258 |
| 47 | ESSESTNTTIEDEDTKVR(16)-NFSGGKSGGNK(6)                  | hub    | linker     | 344-317 |
| 48 | ESSESTNTTIEDEDTKVR(16)-RCLKGAILTTLATR(2)               | hub    | regulatory | 344-298 |
| 49 | ESSESTNTTIEDEDTKVRK(16)-KQEIIK(1)                      | hub    | hub        | 344-347 |
| 50 | ESSESTNTTIEDEDTKVRK(16)-KSDGVK(1)                      | hub    | linker     | 344-323 |
| 51 | FTEEYQLFEELGKGAFSVVR(13)-DGKWQIVHFHR(3)                | kinase | hub        | 21-461  |
| 52 | FTEEYQLFEELGKGAFSVVR(13)-DHQKLER(4)                    | kinase | kinase     | 21-56   |
| 53 | FTEEYQLFEELGKGAFSVVR(13)-DLKPENLLLASK(3)               | kinase | kinase     | 21-137  |
| 54 | FTEEYQLFEELGKGAFSVVR(13)-DLKPENLLLASKLK(12)            | kinase | kinase     | 21-146  |
| 55 | FTEEYQLFEELGKGAFSVVR(13)-IINTKK(5)                     | kinase | kinase     | 21-47   |
| 56 | FTEEYQLFEELGKGAFSVVR(13)-ITAAEALKHPWISHR(8)            | kinase | kinase     | 21-267  |
| 57 | FTEEYQLFEELGKGAFSVVR(13)-KQEIIK(1)                     | kinase | hub        | 21-347  |
| 58 | FTEEYQLFEELGKGAFSVVR(13)-KSDGVK(1)                     | kinase | linker     | 21-323  |
| 59 | FTEEYQLFEELGKGAFSVVR(13)-LKGAAVK(2)                    | kinase | kinase     | 21-148  |
| 60 | FTEEYQLFEELGKGAFSVVR(13)-LKGAILTTLATR(2)               | kinase | regulatory | 21-300  |
| 61 | FTEEYQLFEELGKGAFSVVR(13)-MLTINPSKR(8)                  | kinase | kinase     | 21-258  |
| 62 | FTEEYQLFEELGKGAFSVVR(13)-NFSGGKSGGNK(6)                | kinase | linker     | 21-317  |
| 63 | FTEEYQLFEELGKGAFSVVR(13)-VLAGQEYAAKIINTK(10)           | kinase | kinase     | 21-42   |
| 64 | FTEEYQLFEELGKGAFSVVRR(13)-IINTKKLSAR(5)                | kinase | kinase     | 21-47   |
| 65 | FTEEYQLFEELGKGAFSVVRR(13)-IINTKKLSAR(6)                | kinase | kinase     | 21-48   |
| 66 | GAAVKLADFGLAIEVEGEQQAWFGFAGTPGYLSPEVLR(5)-LLKHPNIVR(3) | kinase | kinase     | 153-68  |
| 67 | IINTKK(5)-IINTKK(5)                                    | kinase | kinase     | 47-47   |
| 68 | IINTKK(5)-LKGAAVK(2)                                   | kinase | kinase     | 47-148  |
| 69 | ITAAEALKHPWISHR(8)-DLINKMLTINPSK(5)                    | kinase | kinase     | 267-250 |
| 70 | ITAAEALKHPWISHR(8)-DLKPENLLLASK(3)                     | kinase | kinase     | 267-137 |
| 71 | ITAAEALKHPWISHR(8)-KQEIIK(1)                           | kinase | hub        | 267-347 |
| 72 | ITAAEALKHPWISHR(8)-KSDGVK(1)                           | kinase | linker     | 267-323 |

|     |                                                    |            |            |         |
|-----|----------------------------------------------------|------------|------------|---------|
| 73  | ITAAEALKHPWISHR(8)-MLTINPSKR(8)                    | kinase     | kinase     | 267-258 |
| 74  | KLKGAILTTMLATR(3)-KLKGAILTTMLATR(1)                | regulatory | regulatory | 300-298 |
| 75  | KQEIIK(1)-IINTKK(5)                                | hub        | kinase     | 347-47  |
| 76  | KQEIIK(1)-KQEIIK(1)                                | hub        | hub        | 347-347 |
| 77  | KQEIIK(1)-KSDGVK(1)                                | hub        | linker     | 347-323 |
| 78  | KQEIIK(1)-LKGA AVK(2)                              | hub        | kinase     | 347-148 |
| 79  | KQEIIKVTEQLIEAISNGGFESYTK(1)-RDGKWQIVHFHR(4)       | hub        | hub        | 347-461 |
| 80  | KQEIIKVTEQLIEAISNGGFESYTK(6)-DHQKLER(4)            | hub        | kinase     | 352-56  |
| 81  | KQEIIKVTEQLIEAISNGGFESYTK(6)-NFSGGKSGGNK(6)        | hub        | linker     | 352-317 |
| 82  | KSDGVKESSESTNTTIEDEDTK(6)-KQEIIK(1)                | linker     | hub        | 328-347 |
| 83  | KSDGVKESSESTNTTIEDEDTK(6)-LKGAILTTMLATR(2)         | linker     | regulatory | 328-300 |
| 84  | KSDGVKESSESTNTTIEDEDTK(6)-NFSGGKSGGNK(6)           | linker     | linker     | 328-317 |
| 85  | KSDGVKESSESTNTTIEDEDTKVR(22)-KQEIIK(1)             | hub        | hub        | 344-347 |
| 86  | LKGA AVK(2)-LKGA AVK(2)                            | kinase     | kinase     | 148-148 |
| 87  | LKGAILTTMLATR(2)-DHQKLER(4)                        | regulatory | kinase     | 300-56  |
| 88  | LKGAILTTMLATR(2)-DLKPENLLLASK(3)                   | regulatory | kinase     | 300-137 |
| 89  | LKGAILTTMLATR(2)-KQEIIK(1)                         | regulatory | hub        | 300-347 |
| 90  | LKGAILTTMLATR(2)-KSDGVK(1)                         | regulatory | linker     | 300-323 |
| 91  | LKGAILTTMLATR(2)-MLTINPSKR(8)                      | regulatory | kinase     | 300-258 |
| 92  | LKGAILTTMLATR(2)-NFSGGKSGGNK(6)                    | regulatory | linker     | 300-317 |
| 93  | LKGAILTTMLATR(2)-QETVDCLKK(8)                      | regulatory | regulatory | 300-291 |
| 94  | LLKHPNIVR(3)-DHQKLER(4)                            | kinase     | kinase     | 68-56   |
| 95  | LLKHPNIVR(3)-KQEIIK(1)                             | kinase     | hub        | 68-347  |
| 96  | LLKHPNIVR(3)-LKGA AVK(2)                           | kinase     | kinase     | 68-148  |
| 97  | LLKHPNIVR(3)-MLTINPSKR(8)                          | kinase     | kinase     | 68-258  |
| 98  | LYQQIKAGAYDFPSPEWDTVPEAK(6)-DGKWQIVHFHR(3)         | kinase     | hub        | 226-461 |
| 99  | LYQQIKAGAYDFPSPEWDTVPEAK(6)-DHQKLER(4)             | kinase     | kinase     | 226-56  |
| 100 | LYQQIKAGAYDFPSPEWDTVPEAK(6)-DLINKMLTINPSK(5)       | kinase     | kinase     | 226-250 |
| 101 | LYQQIKAGAYDFPSPEWDTVPEAK(6)-DLKPENLLLASK(3)        | kinase     | kinase     | 226-137 |
| 102 | LYQQIKAGAYDFPSPEWDTVPEAK(6)-DLKPENLLLASKLK(12)     | kinase     | kinase     | 226-146 |
| 103 | LYQQIKAGAYDFPSPEWDTVPEAK(6)-ESSESTNTTIEDEDTKVR(16) | kinase     | hub        | 226-344 |
| 104 | LYQQIKAGAYDFPSPEWDTVPEAK(6)-IINTKK(5)              | kinase     | kinase     | 226-47  |
| 105 | LYQQIKAGAYDFPSPEWDTVPEAK(6)-ITAAEALKHPWISHR(8)     | kinase     | kinase     | 226-267 |
| 106 | LYQQIKAGAYDFPSPEWDTVPEAK(6)-KQEIIK(1)              | kinase     | hub        | 226-347 |
| 107 | LYQQIKAGAYDFPSPEWDTVPEAK(6)-KSDGVK(1)              | kinase     | linker     | 226-323 |
| 108 | LYQQIKAGAYDFPSPEWDTVPEAK(6)-LKGA AVK(2)            | kinase     | kinase     | 226-148 |
| 109 | LYQQIKAGAYDFPSPEWDTVPEAK(6)-LKGAILTTMLATR(2)       | kinase     | regulatory | 226-300 |

|     |                                                         |            |            |         |
|-----|---------------------------------------------------------|------------|------------|---------|
| 110 | LYQQIKAGAYDFPSPEWDTVPEAK(6)-LLKHPNIVR(3)                | kinase     | kinase     | 226-68  |
| 111 | LYQQIKAGAYDFPSPEWDTVPEAK(6)-LYQQIKAGAYDFPSPEWDTVPEAK(6) | kinase     | kinase     | 226-226 |
| 112 | LYQQIKAGAYDFPSPEWDTVPEAK(6)-MLTINPSKR(8)                | kinase     | kinase     | 226-258 |
| 113 | LYQQIKAGAYDFPSPEWDTVPEAK(6)-NFSGGKSGGNK(6)              | kinase     | linker     | 226-317 |
| 114 | LYQQIKAGAYDFPSPEWDTVPEAK(6)-SDGVKESSESTNTTIEDTK(5)      | kinase     | linker     | 226-328 |
| 115 | LYQQIKAGAYDFPSPEWDTVPEAK(6)-VLAGQEYAAKIINTK(10)         | kinase     | kinase     | 226-42  |
| 116 | MLTINPSKR(8)-DHQKLER(4)                                 | kinase     | kinase     | 258-56  |
| 117 | MLTINPSKR(8)-IINTKK(5)                                  | kinase     | kinase     | 258-47  |
| 118 | MLTINPSKR(8)-KQEIIK(1)                                  | kinase     | hub        | 258-347 |
| 119 | MLTINPSKR(8)-KSDGVK(1)                                  | kinase     | linker     | 258-323 |
| 120 | MLTINPSKR(8)-LKGAAVK(2)                                 | kinase     | kinase     | 258-148 |
| 121 | MLTINPSKR(8)-MLTINPSKR(8)                               | kinase     | kinase     | 258-258 |
| 122 | MLTINPSKR(8)-NFSGGKSGGNK(6)                             | kinase     | linker     | 258-317 |
| 123 | NFSGGKSGGNK(6)-DHQKLER(4)                               | linker     | kinase     | 317-56  |
| 124 | NFSGGKSGGNK(6)-KQEIIK(1)                                | linker     | hub        | 317-347 |
| 125 | NFSGGKSGGNK(6)-KSDGVK(1)                                | linker     | linker     | 317-323 |
| 126 | NFSGGKSGGNK(6)-LKGAAVK(2)                               | linker     | kinase     | 317-148 |
| 127 | NFSGGKSGGNK(6)-NFSGGKSGGNK(6)                           | linker     | linker     | 317-317 |
| 128 | QEIIKVTEQLIEAISNGGFESYTK(5)-DGKWQIVHFHR(3)              | hub        | hub        | 352-461 |
| 129 | QEIIKVTEQLIEAISNGGFESYTK(5)-DHQKLER(4)                  | hub        | kinase     | 352-56  |
| 130 | QEIIKVTEQLIEAISNGGFESYTK(5)-MLTINPSKR(8)                | hub        | kinase     | 352-258 |
| 131 | QEIIKVTEQLIEAISNGGFESYTK(5)-NFSGGKSGGNK(6)              | hub        | linker     | 352-317 |
| 132 | QETVDCLKK(8)-DHQKLER(4)                                 | regulatory | kinase     | 291-56  |
| 133 | QETVDCLKK(8)-KQEIIK(1)                                  | regulatory | hub        | 291-347 |
| 134 | QETVDCLKK(8)-KSDGVK(1)                                  | regulatory | linker     | 291-323 |
| 135 | QETVDCLKK(8)-LLKHPNIVR(3)                               | regulatory | kinase     | 291-68  |
| 136 | QETVDCLKK(8)-NFSGGKSGGNK(6)                             | regulatory | linker     | 291-317 |
| 137 | RDGKWQIVHFHR(4)-SGGNKSDGVK(5)                           | hub        | linker     | 461-322 |
| 138 | RKLGAILTTMLATR(2)-DLKPENLLLASK(3)                       | regulatory | kinase     | 298-137 |
| 139 | RKLGAILTTMLATR(2)-RKLGAILTTMLATR(2)                     | regulatory | regulatory | 298-298 |
| 140 | RKLGAILTTMLATR(2)-VLAGQEYAAKIINTK(10)                   | regulatory | kinase     | 298-42  |
| 141 | RKLGAILTTMLATR(4)-DHQKLER(4)                            | regulatory | kinase     | 300-56  |
| 142 | SDGVKESSESTNTTIEDTK(5)-DGKWQIVHFHR(3)                   | linker     | hub        | 328-461 |
| 143 | SDGVKESSESTNTTIEDTK(5)-DHQKLER(4)                       | linker     | kinase     | 328-56  |
| 144 | SDGVKESSESTNTTIEDTK(5)-DLINKMLTINPSK(5)                 | linker     | kinase     | 328-250 |
| 145 | SDGVKESSESTNTTIEDTK(5)-DLKPENLLLASK(3)                  | linker     | kinase     | 328-137 |
| 146 | SDGVKESSESTNTTIEDTK(5)-DLKPENLLLASKLK(12)               | linker     | kinase     | 328-146 |



|     |                                                 |        |            |         |
|-----|-------------------------------------------------|--------|------------|---------|
| 147 | SDGVKESSESTNTTIEDEDTK(5)-ESSESTNTTIEDEDTKVR(16) | linker | hub        | 328-344 |
| 148 | SDGVKESSESTNTTIEDEDTK(5)-ITAAEALKHPWISHR(8)     | linker | kinase     | 328-267 |
| 149 | SDGVKESSESTNTTIEDEDTK(5)-KQEIIK(1)              | linker | hub        | 328-347 |
| 150 | SDGVKESSESTNTTIEDEDTK(5)-KSDGVK(1)              | linker | linker     | 328-323 |
| 151 | SDGVKESSESTNTTIEDEDTK(5)-LKGAAVK(2)             | linker | kinase     | 328-148 |
| 152 | SDGVKESSESTNTTIEDEDTK(5)-LKGAILTTMLATR(2)       | linker | regulatory | 328-300 |
| 153 | SDGVKESSESTNTTIEDEDTK(5)-LLKHPNIVR(3)           | linker | kinase     | 328-68  |
| 154 | SDGVKESSESTNTTIEDEDTK(5)-MLTINPSKR(8)           | linker | kinase     | 328-258 |
| 155 | SDGVKESSESTNTTIEDEDTK(5)-NFSGGKSGGNK(6)         | linker | linker     | 328-317 |
| 156 | SDGVKESSESTNTTIEDEDTK(5)-NFSGGKSGGNKK(6)        | linker | linker     | 328-317 |
| 157 | SDGVKESSESTNTTIEDEDTK(5)-RKLKGAILTTMLATR(2)     | linker | regulatory | 328-298 |
| 158 | SDGVKESSESTNTTIEDEDTK(5)-VLAGQEYAAKIINTK(10)    | linker | kinase     | 328-42  |
| 159 | VLAGQEYAAKIINTK(10)-DHQKLER(4)                  | kinase | kinase     | 42-56   |
| 160 | VLAGQEYAAKIINTK(10)-DLKPENLLLASK(3)             | kinase | kinase     | 42-137  |
| 161 | VLAGQEYAAKIINTK(10)-DLKPENLLLASKLK(12)          | kinase | kinase     | 42-146  |
| 162 | VLAGQEYAAKIINTK(10)-KSDGVK(1)                   | kinase | linker     | 42-323  |
| 163 | VLAGQEYAAKIINTK(10)-LKGAAVK(2)                  | kinase | kinase     | 42-148  |
| 164 | VLAGQEYAAKIINTK(10)-LKGAILTTMLATR(2)            | kinase | regulatory | 42-300  |
| 165 | VLAGQEYAAKIINTK(10)-LLKHPNIVR(3)                | kinase | kinase     | 42-68   |
| 166 | VLAGQEYAAKIINTK(10)-MLTINPSKR(8)                | kinase | kinase     | 42-258  |
| 167 | VLAGQEYAAKIINTK(10)-NFSGGKSGGNK(6)              | kinase | linker     | 42-317  |
| 168 | VLAGQEYAAKIINTK(10)-DHQKLER(4)                  | kinase | kinase     | 42-56   |

## Heterotypic crosslinks (basal, 30 min)

| # | Peptides                         | domain_a | domain_b | crosslinked lysines | R sample 1 | R sample 2 |
|---|----------------------------------|----------|----------|---------------------|------------|------------|
| 1 | DGKWQIVHFHR(3)-DLKPENLLLASK(3)   | hub      | kinase   | 461-137             | 0,15       | 0,12       |
| 2 | LLKHPNIVR(3)-KQEIIK(1)           | kinase   | hub      | 68-347              | 0,08       | 0,13       |
| 3 | ESSESTNTTIEDEDTKVR(16)-IINTKK(5) | hub      | kinase   | 344-47              | 0,02       | 0,05       |

| Heterotypic crosslinks (basal, 150 min) |                                        |          |          |                     |            |            |
|-----------------------------------------|----------------------------------------|----------|----------|---------------------|------------|------------|
| #                                       | Peptides                               | domain_a | domain_b | crosslinked lysines | R sample 1 | R sample 2 |
| 1                                       | DGKWQIVHFHR(3)-DLKPENLLLASK(3)         | hub      | kinase   | 461-137             | 0,12       | 0,09       |
| 2                                       | DLKPENLLLASK(3)-KQEIIK(1)              | kinase   | hub      | 137-347             | 0,09       | 0,08       |
| 3                                       | DLKPENLLLASKLK(12)-DLINKMLTINPSK(5)    | kinase   | kinase   | 146-250             | 0,05       | 0,08       |
| 4                                       | DLKPENLLLASKLK(12)-DLKPENLLLASK(3)     | kinase   | kinase   | 146-137             | 0,10       | 0,08       |
| 5                                       | DLKPENLLLASKLK(12)-IINTKK(5)           | kinase   | kinase   | 146-47              | 0,06       | 0,07       |
| 6                                       | ESSESTNTTIEDEDTKVR(16)-DLKPENLLLASK(3) | hub      | kinase   | 344-137             | 0,09       | 0,13       |
| 7                                       | ITAAEALKHPWISHR(8)-DLKPENLLLASKLK(12)  | kinase   | kinase   | 267-146             | 0,07       | 0,28       |
| 8                                       | VLAGQEYAAKIINTK(10)-DLINKMLTINPSK(5)   | kinase   | kinase   | 42-250              | 0,06       | 0,06       |

## Homotypic crosslinks (activated, 30 min)

| #  | Peptide                                        | domain_a | domain_b | crosslinked lysines |
|----|------------------------------------------------|----------|----------|---------------------|
| 1  | AGAYDFPSPEWDTVPEAKDLINK(19)-DHQKLER(4)         | kinase   | kinase   | 245-56              |
| 2  | AGAYDFPSPEWDTVPEAKDLINK(19)-DLKPENLLLASK(3)    | kinase   | kinase   | 245-137             |
| 3  | AGAYDFPSPEWDTVPEAKDLINK(19)-ITAAEALKHPWISHR(8) | kinase   | kinase   | 245-267             |
| 4  | AGAYDFPSPEWDTVPEAKDLINK(19)-KQEIIK(1)          | kinase   | hub      | 245-347             |
| 5  | CVKVLAGEYAAK(3)-IINTKK(5)                      | kinase   | kinase   | 32-47               |
| 6  | CVKVLAGEYAAK(3)-LLKHPNIVR(3)                   | kinase   | kinase   | 32-68               |
| 7  | DGKWQIVHFHR(3)-KQEIIK(1)                       | hub      | hub      | 461-347             |
| 8  | DGKWQIVHFHR(3)-KSDGVK(1)                       | hub      | linker   | 461-323             |
| 9  | DGKWQIVHFHR(3)-NFSGGKSGGNK(6)                  | hub      | linker   | 461-317             |
| 10 | DHQKLER(4)-DHQKLER(4)                          | kinase   | kinase   | 56-56               |
| 11 | DHQKLER(4)-IINTKK(5)                           | kinase   | kinase   | 56-47               |
| 12 | DLINKMLTINPSK(5)-DLKPENLLLASK(3)               | kinase   | kinase   | 250-137             |
| 13 | DLKPENLLLASK(3)-DHQKLER(4)                     | kinase   | kinase   | 137-56              |
| 14 | DLKPENLLLASK(3)-DLKPENLLLASK(3)                | kinase   | kinase   | 137-137             |
| 15 | DLKPENLLLASK(3)-KSDGVK(1)                      | kinase   | linker   | 137-323             |
| 16 | DLKPENLLLASK(3)-LKGAAVK(2)                     | kinase   | kinase   | 137-148             |
| 17 | DLKPENLLLASK(3)-MLTINPSKR(8)                   | kinase   | kinase   | 137-258             |
| 18 | DLKPENLLLASK(3)-NFSGGKSGGNK(6)                 | kinase   | linker   | 137-317             |
| 19 | DLKPENLLLASKLK(12)-DHQKLER(4)                  | kinase   | kinase   | 146-56              |
| 20 | DLKPENLLLASKLK(12)-KSDGVK(1)                   | kinase   | linker   | 146-323             |
| 21 | DLKPENLLLASKLK(12)-LLKHPNIVR(3)                | kinase   | kinase   | 146-68              |
| 22 | ESSESTNTTIEDEDTKVR(16)-DGKWQIVHFHR(3)          | hub      | hub      | 344-461             |
| 23 | ESSESTNTTIEDEDTKVR(16)-ESSESTNTTIEDEDTKVR(16)  | hub      | hub      | 344-344             |
| 24 | ESSESTNTTIEDEDTKVR(16)-KQEIIK(1)               | hub      | hub      | 344-347             |
| 25 | ESSESTNTTIEDEDTKVR(16)-KSDGVK(1)               | hub      | linker   | 344-323             |
| 26 | ESSESTNTTIEDEDTKVR(16)-NFSGGKSGGNK(6)          | hub      | linker   | 344-317             |
| 27 | ESSESTNTTIEDEDTKVRK(16)-ESSESTNTTIEDEDTKVR(16) | hub      | hub      | 344-344             |
| 28 | ESSESTNTTIEDEDTKVRK(16)-KQEIIK(1)              | hub      | hub      | 344-347             |
| 29 | IINTKK(5)-IINTKK(5)                            | kinase   | kinase   | 47-47               |
| 30 | IINTKK(5)-LKGAAVK(2)                           | kinase   | kinase   | 47-148              |
| 31 | ITAAEALKHPWISHR(8)-DLINKMLTINPSK(5)            | kinase   | kinase   | 267-250             |
| 32 | ITAAEALKHPWISHR(8)-DLKPENLLLASKLK(12)          | kinase   | kinase   | 267-146             |
| 33 | ITAAEALKHPWISHR(8)-ITAAEALKHPWISHR(8)          | kinase   | kinase   | 267-267             |
| 34 | ITAAEALKHPWISHR(8)-KQEIIK(1)                   | kinase   | hub      | 267-347             |
| 35 | ITAAEALKHPWISHR(8)-KSDGVK(1)                   | kinase   | linker   | 267-323             |

|    |                                                         |            |        |         |
|----|---------------------------------------------------------|------------|--------|---------|
| 36 | ITAAEALKHPWISHR(8)-LKGA AVK(2)                          | kinase     | kinase | 267-148 |
| 37 | ITAAEALKHPWISHR(8)-MLTINPSKR(8)                         | kinase     | kinase | 267-258 |
| 38 | ITAAEALKHPWISHR(8)-NFSGGKSGGNK(6)                       | kinase     | linker | 267-317 |
| 39 | KQEIIK(1)-IINTKK(5)                                     | hub        | kinase | 347-47  |
| 40 | KQEIIK(1)-KSDGVK(1)                                     | hub        | linker | 347-323 |
| 41 | KQEIIK(1)-LKGA AVK(2)                                   | hub        | kinase | 347-148 |
| 42 | KSDGVKESSESTNTTIEDEDTK(6)-KQEIIK(1)                     | linker     | hub    | 328-347 |
| 43 | KSDGVKESSESTNTTIEDEDTK(6)-NFSGGKSGGNK(6)                | linker     | linker | 328-317 |
| 44 | LKGA AVK(2)-LKGA AVK(2)                                 | kinase     | kinase | 148-148 |
| 45 | LKGAILTTMLATR(2)-DHQKLER(4)                             | regulatory | kinase | 300-56  |
| 46 | LKGAILTTMLATR(2)-KSDGVK(1)                              | regulatory | linker | 300-323 |
| 47 | LKGAILTTMLATR(2)-NFSGGKSGGNK(6)                         | regulatory | linker | 300-317 |
| 48 | LLKHPNIVR(3)-DHQKLER(4)                                 | kinase     | kinase | 68-56   |
| 49 | LLKHPNIVR(3)-KQEIIK(1)                                  | kinase     | hub    | 68-347  |
| 50 | LLKHPNIVR(3)-LLKHPNIVR(3)                               | kinase     | kinase | 68-68   |
| 51 | LYQQIKAGAYDFPSPEWDTVPEAK(6)-DHQKLER(4)                  | kinase     | kinase | 226-56  |
| 52 | LYQQIKAGAYDFPSPEWDTVPEAK(6)-DLKPENLLLASKLK(12)          | kinase     | kinase | 226-146 |
| 53 | LYQQIKAGAYDFPSPEWDTVPEAK(6)-IINTKK(5)                   | kinase     | kinase | 226-47  |
| 54 | LYQQIKAGAYDFPSPEWDTVPEAK(6)-KSDGVK(1)                   | kinase     | linker | 226-323 |
| 55 | LYQQIKAGAYDFPSPEWDTVPEAK(6)-LYQQIKAGAYDFPSPEWDTVPEAK(6) | kinase     | kinase | 226-226 |
| 56 | LYQQIKAGAYDFPSPEWDTVPEAK(6)-MLTINPSKR(8)                | kinase     | kinase | 226-258 |
| 57 | LYQQIKAGAYDFPSPEWDTVPEAK(6)-NFSGGKSGGNK(6)              | kinase     | linker | 226-317 |
| 58 | MLTINPSKR(8)-DHQKLER(4)                                 | kinase     | kinase | 258-56  |
| 59 | MLTINPSKR(8)-IINTKK(5)                                  | kinase     | kinase | 258-47  |
| 60 | MLTINPSKR(8)-KQEIIK(1)                                  | kinase     | hub    | 258-347 |
| 61 | MLTINPSKR(8)-KSDGVK(1)                                  | kinase     | linker | 258-323 |
| 62 | MLTINPSKR(8)-LKGA AVK(2)                                | kinase     | kinase | 258-148 |
| 63 | MLTINPSKR(8)-MLTINPSKR(8)                               | kinase     | kinase | 258-258 |
| 64 | MLTINPSKR(8)-NFSGGKSGGNK(6)                             | kinase     | linker | 258-317 |
| 65 | NFSGGKSGGNK(6)-KQEIIK(1)                                | linker     | hub    | 317-347 |
| 66 | NFSGGKSGGNK(6)-KSDGVK(1)                                | linker     | linker | 317-323 |
| 67 | NFSGGKSGGNK(6)-NFSGGKSGGNK(6)                           | linker     | linker | 317-317 |
| 68 | QETVDCLKK(8)-LLKHPNIVR(3)                               | regulatory | kinase | 291-68  |
| 69 | RITAAEALKHPWISHR(9)-DLINKMLTINPSKR(13)                  | kinase     | kinase | 267-258 |
| 70 | RITAAEALKHPWISHR(9)-DLINKMLTINPSKR(5)                   | kinase     | kinase | 267-250 |
| 71 | SDGVKESSESTNTTIEDEDTK(5)-DGKWQIVHFHR(3)                 | linker     | hub    | 328-461 |
| 72 | SDGVKESSESTNTTIEDEDTK(5)-ESSESTNTTIEDEDTKVR(16)         | linker     | HUB    | 328-344 |

|    |                                                   |        |        |         |
|----|---------------------------------------------------|--------|--------|---------|
| 73 | SDGVKESSESTNTTIEDEDTK(5)-KQEIIK(1)                | linker | hub    | 328-347 |
| 74 | SDGVKESSESTNTTIEDEDTK(5)-KSDGVK(1)                | linker | linker | 328-323 |
| 75 | SDGVKESSESTNTTIEDEDTK(5)-LKGAAVK(2)               | linker | kinase | 328-148 |
| 76 | SDGVKESSESTNTTIEDEDTK(5)-LLKHPNIVR(3)             | linker | kinase | 328-68  |
| 77 | SDGVKESSESTNTTIEDEDTK(5)-MLTINPSKR(8)             | linker | kinase | 328-258 |
| 78 | SDGVKESSESTNTTIEDEDTK(5)-NFSGGKSGGNK(6)           | linker | linker | 328-317 |
| 79 | SDGVKESSESTNTTIEDEDTK(5)-NFSGGKSGGNK(6)           | linker | linker | 328-317 |
| 80 | SDGVKESSESTNTTIEDEDTK(5)-SDGVKESSESTNTTIEDEDTK(5) | linker | linker | 328-328 |
| 81 | SDGVKESSESTNTTIEDEDTKVR(21)-KQEIIK(1)             | hub    | hub    | 344-347 |
| 82 | VLAGQEYAAKIINTK(10)-DHQKLER(4)                    | kinase | kinase | 42-56   |
| 83 | VLAGQEYAAKIINTK(10)-LLKHPNIVR(3)                  | kinase | kinase | 42-68   |
| 84 | VLAGQEYAAKIINTK(10)-MLTINPSKR(8)                  | kinase | kinase | 42-258  |
| 85 | VLAGQEYAAKIINTK(10)-VLAGQEYAAKIINTK(10)           | kinase | kinase | 42-42   |

## Supplementary File 1F

| Homotypic crosslinks (activated, 150 min) |                                                 |          |          |                     |
|-------------------------------------------|-------------------------------------------------|----------|----------|---------------------|
| #                                         | Peptide                                         | domain_a | domain_b | crosslinked lysines |
| 1                                         | AGAYDFPSPEWDTVTPEAKDLINK(19)-DGKWQIVHFHR(3)     | kinase   | hub      | 245-461             |
| 2                                         | AGAYDFPSPEWDTVTPEAKDLINK(19)-ITAAEALKHPWISHR(8) | kinase   | kinase   | 245-267             |
| 3                                         | AGAYDFPSPEWDTVTPEAKDLINK(19)-MLTINPSKR(8)       | kinase   | kinase   | 245-258             |
| 4                                         | AGAYDFPSPEWDTVTPEAKDLINK(19)-NFSGGKSGGNK(6)     | kinase   | linker   | 245-317             |
| 5                                         | CVKVLAGEEYAAK(3)-IINTKK(5)                      | kinase   | kinase   | 32-47               |
| 6                                         | DGKWQIVHFHR(3)-KQEIIK(1)                        | hub      | hub      | 461-347             |
| 7                                         | DGKWQIVHFHR(3)-KSDGVK(1)                        | hub      | linker   | 461-323             |
| 8                                         | DGKWQIVHFHR(3)-NFSGGKSGGNK(6)                   | hub      | linker   | 461-317             |
| 9                                         | DHQKLER(4)-DHQKLER(4)                           | kinase   | kinase   | 56-56               |
| 10                                        | DHQKLER(4)-IINTKK(5)                            | kinase   | kinase   | 56-47               |
| 11                                        | DLINKMLTINPSK(5)-DHQKLER(4)                     | kinase   | kinase   | 250-56              |
| 12                                        | DLINKMLTINPSK(5)-DLINKMLTINPSK(5)               | kinase   | kinase   | 250-250             |
| 13                                        | DLINKMLTINPSK(5)-NFSGGKSGGNK(6)                 | kinase   | linker   | 250-317             |
| 14                                        | DLINKMLTINPSKR(5)-DLINKMLTINPSKR(13)            | kinase   | kinase   | 250-258             |
| 15                                        | DLKPENLLLASK(3)-DLKPENLLLASK(3)                 | kinase   | kinase   | 137-137             |
| 16                                        | DLKPENLLLASK(3)-LKGAAVK(2)                      | kinase   | kinase   | 137-148             |
| 17                                        | DLKPENLLLASK(3)-NFSGGKSGGNK(6)                  | kinase   | linker   | 137-317             |
| 18                                        | DLKPENLLLASKLK(12)-DHQKLER(4)                   | kinase   | kinase   | 146-56              |
| 19                                        | DLKPENLLLASKLK(12)-DLKPENLLLASKLK(12)           | kinase   | kinase   | 146-146             |
| 20                                        | ESSESTNTTIEDEDTKVR(16)-DGKWQIVHFHR(3)           | hub      | hub      | 344-461             |
| 21                                        | ESSESTNTTIEDEDTKVR(16)-ESSESTNTTIEDEDTKVR(16)   | hub      | hub      | 344-344             |
| 22                                        | ESSESTNTTIEDEDTKVR(16)-ITAAEALKHPWISHR(8)       | hub      | kinase   | 344-267             |
| 23                                        | ESSESTNTTIEDEDTKVR(16)-KQEIIK(1)                | hub      | hub      | 344-347             |
| 24                                        | ESSESTNTTIEDEDTKVR(16)-KSDGVK(1)                | hub      | linker   | 344-323             |
| 25                                        | ESSESTNTTIEDEDTKVR(16)-LLKHPNIVR(3)             | hub      | kinase   | 344-68              |
| 26                                        | ESSESTNTTIEDEDTKVR(16)-MLTINPSKR(8)             | hub      | kinase   | 344-258             |
| 27                                        | ESSESTNTTIEDEDTKVR(16)-NFSGGKSGGNK(6)           | hub      | linker   | 344-317             |
| 28                                        | ESSESTNTTIEDEDTKVRK(16)-KQEIIK(1)               | hub      | hub      | 344-347             |
| 29                                        | IINTKK(5)-IINTKK(5)                             | kinase   | kinase   | 47-47               |
| 30                                        | IINTKK(5)-LKGAAVK(2)                            | kinase   | kinase   | 47-148              |
| 31                                        | ITAAEALKHPWISHR(8)-DHQKLER(4)                   | kinase   | kinase   | 267-56              |
| 32                                        | ITAAEALKHPWISHR(8)-DLINKMLTINPSK(5)             | kinase   | kinase   | 267-250             |
| 33                                        | ITAAEALKHPWISHR(8)-DLKPENLLLASK(3)              | kinase   | kinase   | 267-137             |
| 34                                        | ITAAEALKHPWISHR(8)-KQEIIK(1)                    | kinase   | hub      | 267-347             |
| 35                                        | ITAAEALKHPWISHR(8)-KSDGVK(1)                    | kinase   | linker   | 267-323             |

|    |                                                         |            |            |         |
|----|---------------------------------------------------------|------------|------------|---------|
| 36 | ITAAEALKHPWISHR(8)-MLTINPSKR(8)                         | kinase     | kinase     | 267-258 |
| 37 | ITAAEALKHPWISHR(8)-NFSGGKSGGNK(6)                       | kinase     | linker     | 267-317 |
| 38 | KQEIIK(1)-KQEIIK(1)                                     | hub        | hub        | 347-347 |
| 39 | KQEIIK(1)-KSDGVK(1)                                     | hub        | linker     | 347-323 |
| 40 | KQEIIK(1)-LKGA AVK(2)                                   | hub        | kinase     | 347-148 |
| 41 | KQEIIKVTEQLIEAISNGGFESYTK(1)-RDGKWQIVHFHR(4)            | hub        | hub        | 347-461 |
| 42 | KQEIIKVTEQLIEAISNGGFESYTK(6)-ESSESTNTTIEDEDTKVR(16)     | hub        | hub        | 352-344 |
| 43 | KQEIIKVTEQLIEAISNGGFESYTK(6)-KSDGVK(1)                  | hub        | linker     | 352-323 |
| 44 | KSDGVKESSESTNTTIEDEDTK(6)-NFSGGKSGGNK(6)                | linker     | linker     | 328-317 |
| 45 | LKGAILTTMLATR(2)-KQEIIK(1)                              | regulatory | hub        | 300-347 |
| 46 | LKGAILTTMLATR(2)-KSDGVK(1)                              | regulatory | linker     | 300-323 |
| 47 | LKGAILTTMLATR(2)-NFSGGKSGGNK(6)                         | regulatory | linker     | 300-317 |
| 48 | LKGAILTTMLATR(2)-QETVDCLKK(8)                           | regulatory | regulatory | 300-291 |
| 49 | LLKHPNIVR(3)-DHQKLER(4)                                 | kinase     | kinase     | 68-56   |
| 50 | LLKHPNIVR(3)-NFSGGKSGGNK(6)                             | kinase     | linker     | 68-317  |
| 51 | LYQQIKAGAYDFPSPEWDTVPEAK(6)-DGKWQIVHFHR(3)              | kinase     | hub        | 226-461 |
| 52 | LYQQIKAGAYDFPSPEWDTVPEAK(6)-DHQKLER(4)                  | kinase     | kinase     | 226-56  |
| 53 | LYQQIKAGAYDFPSPEWDTVPEAK(6)-DLINKMLTINPSK(5)            | kinase     | kinase     | 226-250 |
| 54 | LYQQIKAGAYDFPSPEWDTVPEAK(6)-ITAAEALKHPWISHR(8)          | kinase     | kinase     | 226-267 |
| 55 | LYQQIKAGAYDFPSPEWDTVPEAK(6)-LYQQIKAGAYDFPSPEWDTVPEAK(6) | kinase     | kinase     | 226-226 |
| 56 | LYQQIKAGAYDFPSPEWDTVPEAK(6)-MLTINPSKR(8)                | kinase     | kinase     | 226-258 |
| 57 | LYQQIKAGAYDFPSPEWDTVPEAK(6)-NFSGGKSGGNK(6)              | kinase     | linker     | 226-317 |
| 58 | MLTINPSKR(8)-DHQKLER(4)                                 | kinase     | kinase     | 258-56  |
| 59 | MLTINPSKR(8)-KQEIIK(1)                                  | kinase     | hub        | 258-347 |
| 60 | MLTINPSKR(8)-KSDGVK(1)                                  | kinase     | linker     | 258-323 |
| 61 | MLTINPSKR(8)-LKGA AVK(2)                                | kinase     | kinase     | 258-148 |
| 62 | MLTINPSKR(8)-MLTINPSKR(8)                               | kinase     | kinase     | 258-258 |
| 63 | MLTINPSKR(8)-NFSGGKSGGNK(6)                             | kinase     | linker     | 258-317 |
| 64 | NFSGGKSGGNK(6)-KQEIIK(1)                                | linker     | hub        | 317-347 |
| 65 | NFSGGKSGGNK(6)-KSDGVK(1)                                | linker     | linker     | 317-323 |
| 66 | NFSGGKSGGNK(6)-LKGA AVK(2)                              | linker     | kinase     | 317-148 |
| 67 | NFSGGKSGGNK(6)-NFSGGKSGGNK(6)                           | linker     | linker     | 317-317 |
| 68 | QEIIKVTEQLIEAISNGGFESYTK(5)-DGKWQIVHFHR(3)              | hub        | hub        | 352-461 |
| 69 | RITAAEALKHPWISHR(9)-DLINKMLTINPSKR(13)                  | kinase     | kinase     | 267-258 |
| 70 | RITAAEALKHPWISHR(9)-DLINKMLTINPSKR(5)                   | kinase     | kinase     | 267-250 |
| 71 | SDGVKESSESTNTTIEDEDTK(5)-DGKWQIVHFHR(3)                 | linker     | hub        | 328-461 |
| 72 | SDGVKESSESTNTTIEDEDTK(5)-DHQKLER(4)                     | linker     | kinase     | 328-56  |



|    |                                                   |        |            |         |
|----|---------------------------------------------------|--------|------------|---------|
| 73 | SDGVKESSESTNTTIEDEDTK(5)-DLINKMLTINPSK(5)         | linker | kinase     | 328-250 |
| 74 | SDGVKESSESTNTTIEDEDTK(5)-ESSESTNTTIEDEDTKVR(16)   | linker | hub        | 328-344 |
| 75 | SDGVKESSESTNTTIEDEDTK(5)-ITAAEALKHPWISHR(8)       | linker | kinase     | 328-267 |
| 76 | SDGVKESSESTNTTIEDEDTK(5)-KQEIIK(1)                | linker | hub        | 328-347 |
| 77 | SDGVKESSESTNTTIEDEDTK(5)-KSDGVK(1)                | linker | linker     | 328-323 |
| 78 | SDGVKESSESTNTTIEDEDTK(5)-LKGAILTTMLATR(2)         | linker | regulatory | 328-300 |
| 79 | SDGVKESSESTNTTIEDEDTK(5)-LLKHPNIVR(3)             | linker | kinase     | 328-68  |
| 80 | SDGVKESSESTNTTIEDEDTK(5)-MLTINPSKR(8)             | linker | kinase     | 328-258 |
| 81 | SDGVKESSESTNTTIEDEDTK(5)-NFSGGKSGGNK(6)           | linker | linker     | 328-317 |
| 82 | SDGVKESSESTNTTIEDEDTK(5)-NFSGGKSGGNKK(6)          | linker | linker     | 328-317 |
| 83 | SDGVKESSESTNTTIEDEDTK(5)-RKLKGAILTTMLATR(2)       | linker | regulatory | 328-298 |
| 84 | SDGVKESSESTNTTIEDEDTK(5)-SDGVKESSESTNTTIEDEDTK(5) | linker | linker     | 328-328 |
| 85 | VLAGEYAAKIINTK(10)-DHQKLER(4)                     | kinase | kinase     | 42-56   |
| 86 | VLAGEYAAKIINTK(10)-VLAGEYAAKIINTK(10)             | kinase | kinase     | 42-42   |

## Supplementary File 1G

## Heterotypic crosslinks (activated, 30 min)

| #  | Peptides                                        | domain_a   | domain_b | crosslinked lysines | R sample 1 | R sample 2 |
|----|-------------------------------------------------|------------|----------|---------------------|------------|------------|
| 1  | DLKPENLLLASK(3)-IINTKK(5)                       | kinase     | kinase   | 137-47              | 1,63       | 0,22       |
| 2  | FTEEYQLFEELGKGAFSVVR(13)-MLTINPSKR(8)           | kinase     | kinase   | 21-258              | 0,55       | 0,15       |
| 3  | VLAGEYAAKIINTK(10)-DLINKMLTINPSK(5)             | kinase     | kinase   | 42-250              | 0,35       | 0,34       |
| 4  | DLKPENLLLASKLK(12)-DLKPENLLLASK(3)              | kinase     | kinase   | 146-137             | 0,34       | 0,22       |
| 5  | ESSESTNTTIEDTKVR(16)-DLKPENLLLASK(3)            | hub        | kinase   | 344-137             | 0,33       | 0,19       |
| 6  | ITAAEALKHPWISHR(8)-VLAGEYAAKIINTK(10)           | kinase     | kinase   | 267-42              | 0,29       | 0,24       |
| 7  | NFSGGKSGGNK(6)-DHQKLER(4)                       | linker     | kinase   | 317-56              | 0,27       | 0,21       |
| 8  | LKGAILTTMLATR(2)-DLKPENLLLASK(3)                | regulatory | kinase   | 300-137             | 0,26       | 0,12       |
| 9  | MLTINPSKR(8)-LLKHPNIVR(3)                       | kinase     | kinase   | 258-68              | 0,25       | 0,19       |
| 10 | LYQQIKAGAYDFPSPEWDTVTPEAK(6)-VLAGEYAAKIINTK(10) | kinase     | kinase   | 226-42              | 0,24       | 0,15       |
| 11 | FTEEYQLFEELGKGAFSVVR(13)-LLKHPNIVR(3)           | kinase     | kinase   | 21-68               | 0,23       | 0,17       |
| 12 | FTEEYQLFEELGKGAFSVVR(13)-LKGAAVK(2)             | kinase     | kinase   | 21-148              | 0,23       | 0,20       |
| 13 | ITAAEALKHPWISHR(8)-IINTKK(5)                    | kinase     | kinase   | 267-47              | 0,22       | 0,18       |
| 14 | DLKPENLLLASKLK(12)-LKGAAVK(2)                   | kinase     | kinase   | 146-148             | 0,22       | 0,27       |
| 15 | LLKHPNIVR(3)-IINTKK(5)                          | kinase     | kinase   | 68-47               | 0,21       | 0,22       |
| 16 | AGAYDFPSPEWDTVTPEAKDLINK(19)-LLKHPNIVR(3)       | kinase     | kinase   | 245-68              | 0,19       | 0,35       |
| 17 | DHQKLER(4)-KSDGVK(1)                            | kinase     | linker   | 56-323              | 0,16       | 0,17       |
| 18 | FTEEYQLFEELGKGAFSVVR(13)-DHQKLER(4)             | kinase     | kinase   | 21-56               | 0,15       | 0,12       |
| 19 | VLAGEYAAKIINTK(10)-DLKPENLLLASK(3)              | kinase     | kinase   | 42-137              | 0,15       | 0,21       |
| 20 | ESSESTNTTIEDTKVR(16)-ITAAEALKHPWISHR(8)         | hub        | kinase   | 344-267             | 0,05       | 0,12       |

## Supplementary File 1H

## Heterotypic crosslinks (activated, 150 min)

| #  | Peptides                                        | domain_a   | domain_b | crosslinked lysines | R sample 1 | R sample 2 |
|----|-------------------------------------------------|------------|----------|---------------------|------------|------------|
| 1  | VLAGEYAAKIINTK(10)-DLKPENLLLASKLK(12)           | kinase     | kinase   | 42-146              | 0,56       | 0,40       |
| 2  | FTEEQYLFEEELGKGAFSVVR(13)-ITAAEALKHPWISHR(8)    | kinase     | kinase   | 21-267              | 0,48       | 0,45       |
| 3  | DLKPENLLLASKLK(12)-DLINKMLTINPSK(5)             | kinase     | kinase   | 146-250             | 0,41       | 0,34       |
| 4  | DLKPENLLLASK(3)-LLKHPNIVR(3)                    | kinase     | kinase   | 137-68              | 0,37       | 0,30       |
| 5  | DLKPENLLLASKLK(12)-DLKPENLLLASK(3)              | kinase     | kinase   | 146-137             | 0,37       | 0,29       |
| 6  | FTEEQYLFEEELGKGAFSVVR(13)-DLINKMLTINPSK(5)      | kinase     | kinase   | 21-250              | 0,36       | 0,24       |
| 7  | FTEEQYLFEEELGKGAFSVVR(13)-VLAGEYAAKIINTK(10)    | kinase     | kinase   | 21-42               | 0,33       | 0,24       |
| 8  | MLTINPSKR(8)-GSGSGMTR(1)                        | kinase     | kinase   | 258-1               | 0,33       | 0,20       |
| 9  | NFSGGKSGGNK(6)-DHQKLER(4)                       | linker     | kinase   | 317-56              | 0,31       | 0,27       |
| 10 | DLINKMLTINPSK(5)-IINTKK(5)                      | kinase     | kinase   | 250-47              | 0,30       | 0,19       |
| 11 | ITAAEALKHPWISHR(8)-VLAGEYAAKIINTK(10)           | kinase     | kinase   | 267-42              | 0,30       | 0,25       |
| 12 | FTEEQYLFEEELGKGAFSVVR(13)-MLTINPSKR(8)          | kinase     | kinase   | 21-258              | 0,30       | 0,24       |
| 13 | VLAGEYAAKIINTK(10)-IINTKK(5)                    | kinase     | kinase   | 42-47               | 0,29       | 0,23       |
| 14 | FTEEQYLFEEELGKGAFSVVR(13)-LKGAAVK(2)            | kinase     | kinase   | 21-148              | 0,29       | 0,21       |
| 15 | DHQKLER(4)-KQEIIK(1)                            | kinase     | hub      | 56-347              | 0,28       | 0,15       |
| 16 | LLKHPNIVR(3)-KQEIIK(1)                          | kinase     | hub      | 68-347              | 0,28       | 0,12       |
| 17 | FTEEQYLFEEELGKGAFSVVR(13)-DLKPENLLLASK(3)       | kinase     | kinase   | 21-137              | 0,27       | 0,23       |
| 18 | AGAYDFPSPEWDTVTPEAKDLINK(19)-DHQKLER(4)         | kinase     | kinase   | 245-56              | 0,26       | 0,17       |
| 19 | ESSESTNTTIEDETKVR(16)-DLKPENLLLASK(3)           | hub        | kinase   | 344-137             | 0,26       | 0,18       |
| 20 | MLTINPSKR(8)-IINTKK(5)                          | kinase     | kinase   | 258-47              | 0,25       | 0,18       |
| 21 | FTEEQYLFEEELGKGAFSVVR(13)-DLKPENLLLASKLK(12)    | kinase     | kinase   | 21-146              | 0,25       | 0,15       |
| 22 | AGAYDFPSPEWDTVTPEAKDLINK(19)-GSGSGMTR(1)        | kinase     | kinase   | 245-1               | 0,25       | 0,26       |
| 23 | LKGAILTTLATR(2)-DHQKLER(4)                      | regulatory | kinase   | 300-56              | 0,25       | 0,16       |
| 24 | VLAGEYAAKIINTK(10)-MLTINPSKR(8)                 | kinase     | kinase   | 42-258              | 0,24       | 0,20       |
| 25 | LYQIQKAGAYDFPSPEWDTVTPEAK(6)-VLAGEYAAKIINTK(10) | kinase     | kinase   | 226-42              | 0,24       | 0,25       |
| 26 | GSGSGMTR(1)-LKGAAVK(2)                          | kinase     | kinase   | 1-148               | 0,24       | 0,25       |
| 27 | AGAYDFPSPEWDTVTPEAKDLINK(19)-DLKPENLLLASK(3)    | kinase     | kinase   | 245-137             | 0,23       | 0,19       |
| 28 | FTEEQYLFEEELGKGAFSVVR(13)-KSDGVK(1)             | kinase     | linker   | 21-323              | 0,23       | 0,20       |
| 29 | FTEEQYLFEEELGKGAFSVVR(13)-LLKHPNIVR(3)          | kinase     | kinase   | 21-68               | 0,23       | 0,21       |
| 30 | DLINKMLTINPSK(5)-LKGAAVK(2)                     | kinase     | kinase   | 250-148             | 0,23       | 0,15       |
| 31 | VLAGEYAAKIINTK(10)-LKGAAVK(2)                   | kinase     | kinase   | 42-148              | 0,23       | 0,18       |
| 32 | VLAGEYAAKIINTK(10)-NFSGGKSGGNK(6)               | kinase     | linker   | 42-317              | 0,23       | 0,14       |
| 33 | VLAGEYAAKIINTK(10)-DLKPENLLLASK(3)              | kinase     | kinase   | 42-137              | 0,23       | 0,22       |
| 34 | ITAAEALKHPWISHR(8)-IINTKK(5)                    | kinase     | kinase   | 267-47              | 0,22       | 0,23       |
| 35 | LYQIQKAGAYDFPSPEWDTVTPEAK(6)-DLKPENLLLASK(3)    | kinase     | kinase   | 226-137             | 0,22       | 0,17       |
| 36 | DLINKMLTINPSK(5)-DLKPENLLLASK(3)                | kinase     | kinase   | 250-137             | 0,21       | 0,25       |
| 37 | LKGAILTTLATR(2)-DLKPENLLLASK(3)                 | regulatory | kinase   | 300-137             | 0,21       | 0,19       |
| 38 | AGAYDFPSPEWDTVTPEAKDLINK(19)-DLKPENLLLASKLK(12) | kinase     | kinase   | 245-146             | 0,20       | 0,16       |
| 39 | LYQIQKAGAYDFPSPEWDTVTPEAK(6)-DLKPENLLLASKLK(12) | kinase     | kinase   | 226-146             | 0,19       | 0,15       |
| 40 | LYQIQKAGAYDFPSPEWDTVTPEAK(6)-LKGAAVK(2)         | kinase     | kinase   | 226-148             | 0,19       | 0,12       |
| 41 | LLKHPNIVR(3)-LKGAAVK(2)                         | kinase     | kinase   | 68-148              | 0,18       | 0,20       |

|    |                                  |        |        |         |      |      |
|----|----------------------------------|--------|--------|---------|------|------|
| 42 | VLAGQEYAAKIINTK(10)-LLKHPNIVR(3) | kinase | kinase | 42-68   | 0,17 | 0,15 |
| 43 | DLKPENLLASKLK(12)-MLTINPSKR(8)   | kinase | kinase | 146-258 | 0,16 | 0,16 |
| 44 | VLAGQEYAAKIINTK(10)-KQEIK(1)     | kinase | hub    | 42-347  | 0,16 | 0,15 |
| 45 | DHQKLER(4)-KSDGVK(1)             | kinase | linker | 56-323  | 0,16 | 0,12 |
| 46 | VLAGQEYAAKIINTK(10)-KSDGVK(1)    | kinase | linker | 42-323  | 0,14 | 0,15 |

## Supplementary File 11

| pT286 Heterotypic peptides (30 min) |                                          |            |            |         |      |
|-------------------------------------|------------------------------------------|------------|------------|---------|------|
| #                                   | Peptides                                 | domain_a   | domain_b   | link    | R    |
| 1                                   | QETVDCLKK(8)-LLKHPNIVR(3)                | regulatory | kinase     | 291-68  | 0,15 |
| 2                                   | LYQQIKAGAYDFPSPEWDTVPEAK(6)-QETVDCLKK(8) | kinase     | regulatory | 226-291 | 0,13 |
| 3                                   | VLAGQEYAAKIINTK(10)-QETVDCLKK(8)         | kinase     | regulatory | 42-291  | 0,10 |
| 4                                   | DLKPENLLLASKLK(12)-QETVDCLKK(8)          | kinase     | regulatory | 146-291 | 0,10 |
| 5                                   | QETVDCLKK(8)-MLTINPSKR(8)                | regulatory | kinase     | 291-258 | 0,07 |
| 6                                   | DLINKMLTINPSK(5)-QETVDCLKK(8)            | kinase     | regulatory | 250-291 | 0,05 |

## pT286 Heterotypic peptides (150 min)

| # | Peptides                         | domain_a   | domain_b   | crosslinked lysines | R    |
|---|----------------------------------|------------|------------|---------------------|------|
| 1 | VLAGQEYAAKIINTK(10)-QETVDCLKK(8) | kinase     | regulatory | 42-291              | 0,39 |
| 2 | QETVDCLKK(8)-LLKHPNIVR(3)        | regulatory | kinase     | 291-68              | 0,35 |
| 3 | QETVDCLKK(8)-DHQKLER(4)          | regulatory | kinase     | 291-56              | 0,26 |
| 4 | ITAAEALKHPWISHR(8)-QETVDCLKK(8)  | kinase     | regulatory | 267-291             | 0,18 |
| 5 | DLINKMLTINPSK(5)-QETVDCLKK(8)    | kinase     | regulatory | 250-291             | 0,15 |
| 6 | QETVDCLKK(8)-LKGAAVK(2)          | regulatory | kinase     | 291-148             | 0,11 |
