# Supplementary figures and images for: CaMKII autophosphorylation can occur between holoenzymes without subunit exchange
Source: eLife journal article supplement (doi:10.7554/elife.86090), 2023-08-11

Figure 1E

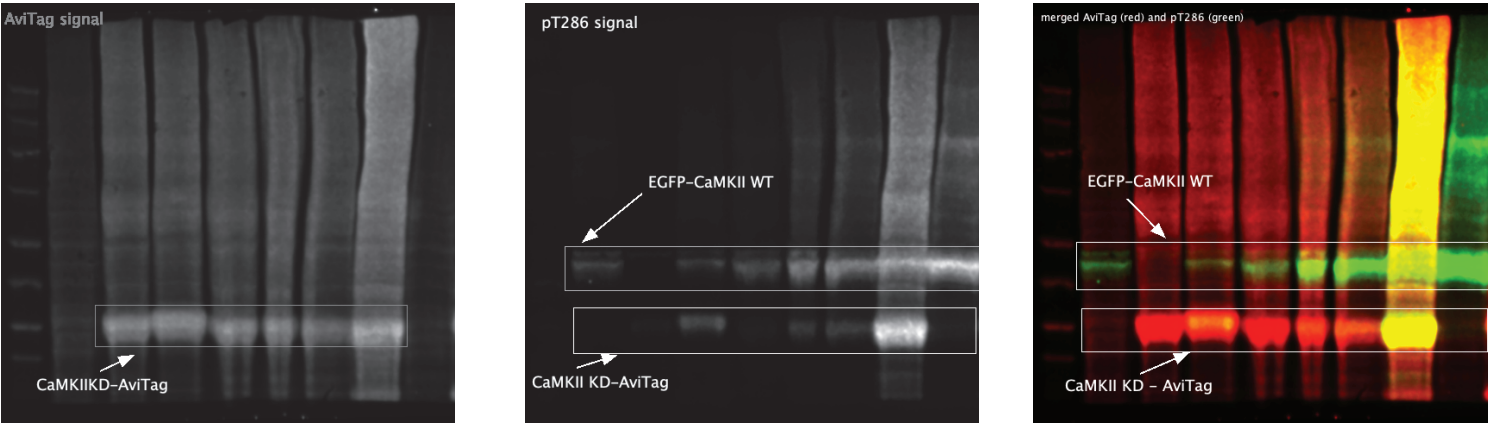

Supplement: fig1-data1 [file elife-86090-fig1-data1-v2.zip]

Figure 1 - figure supplement 1 blots

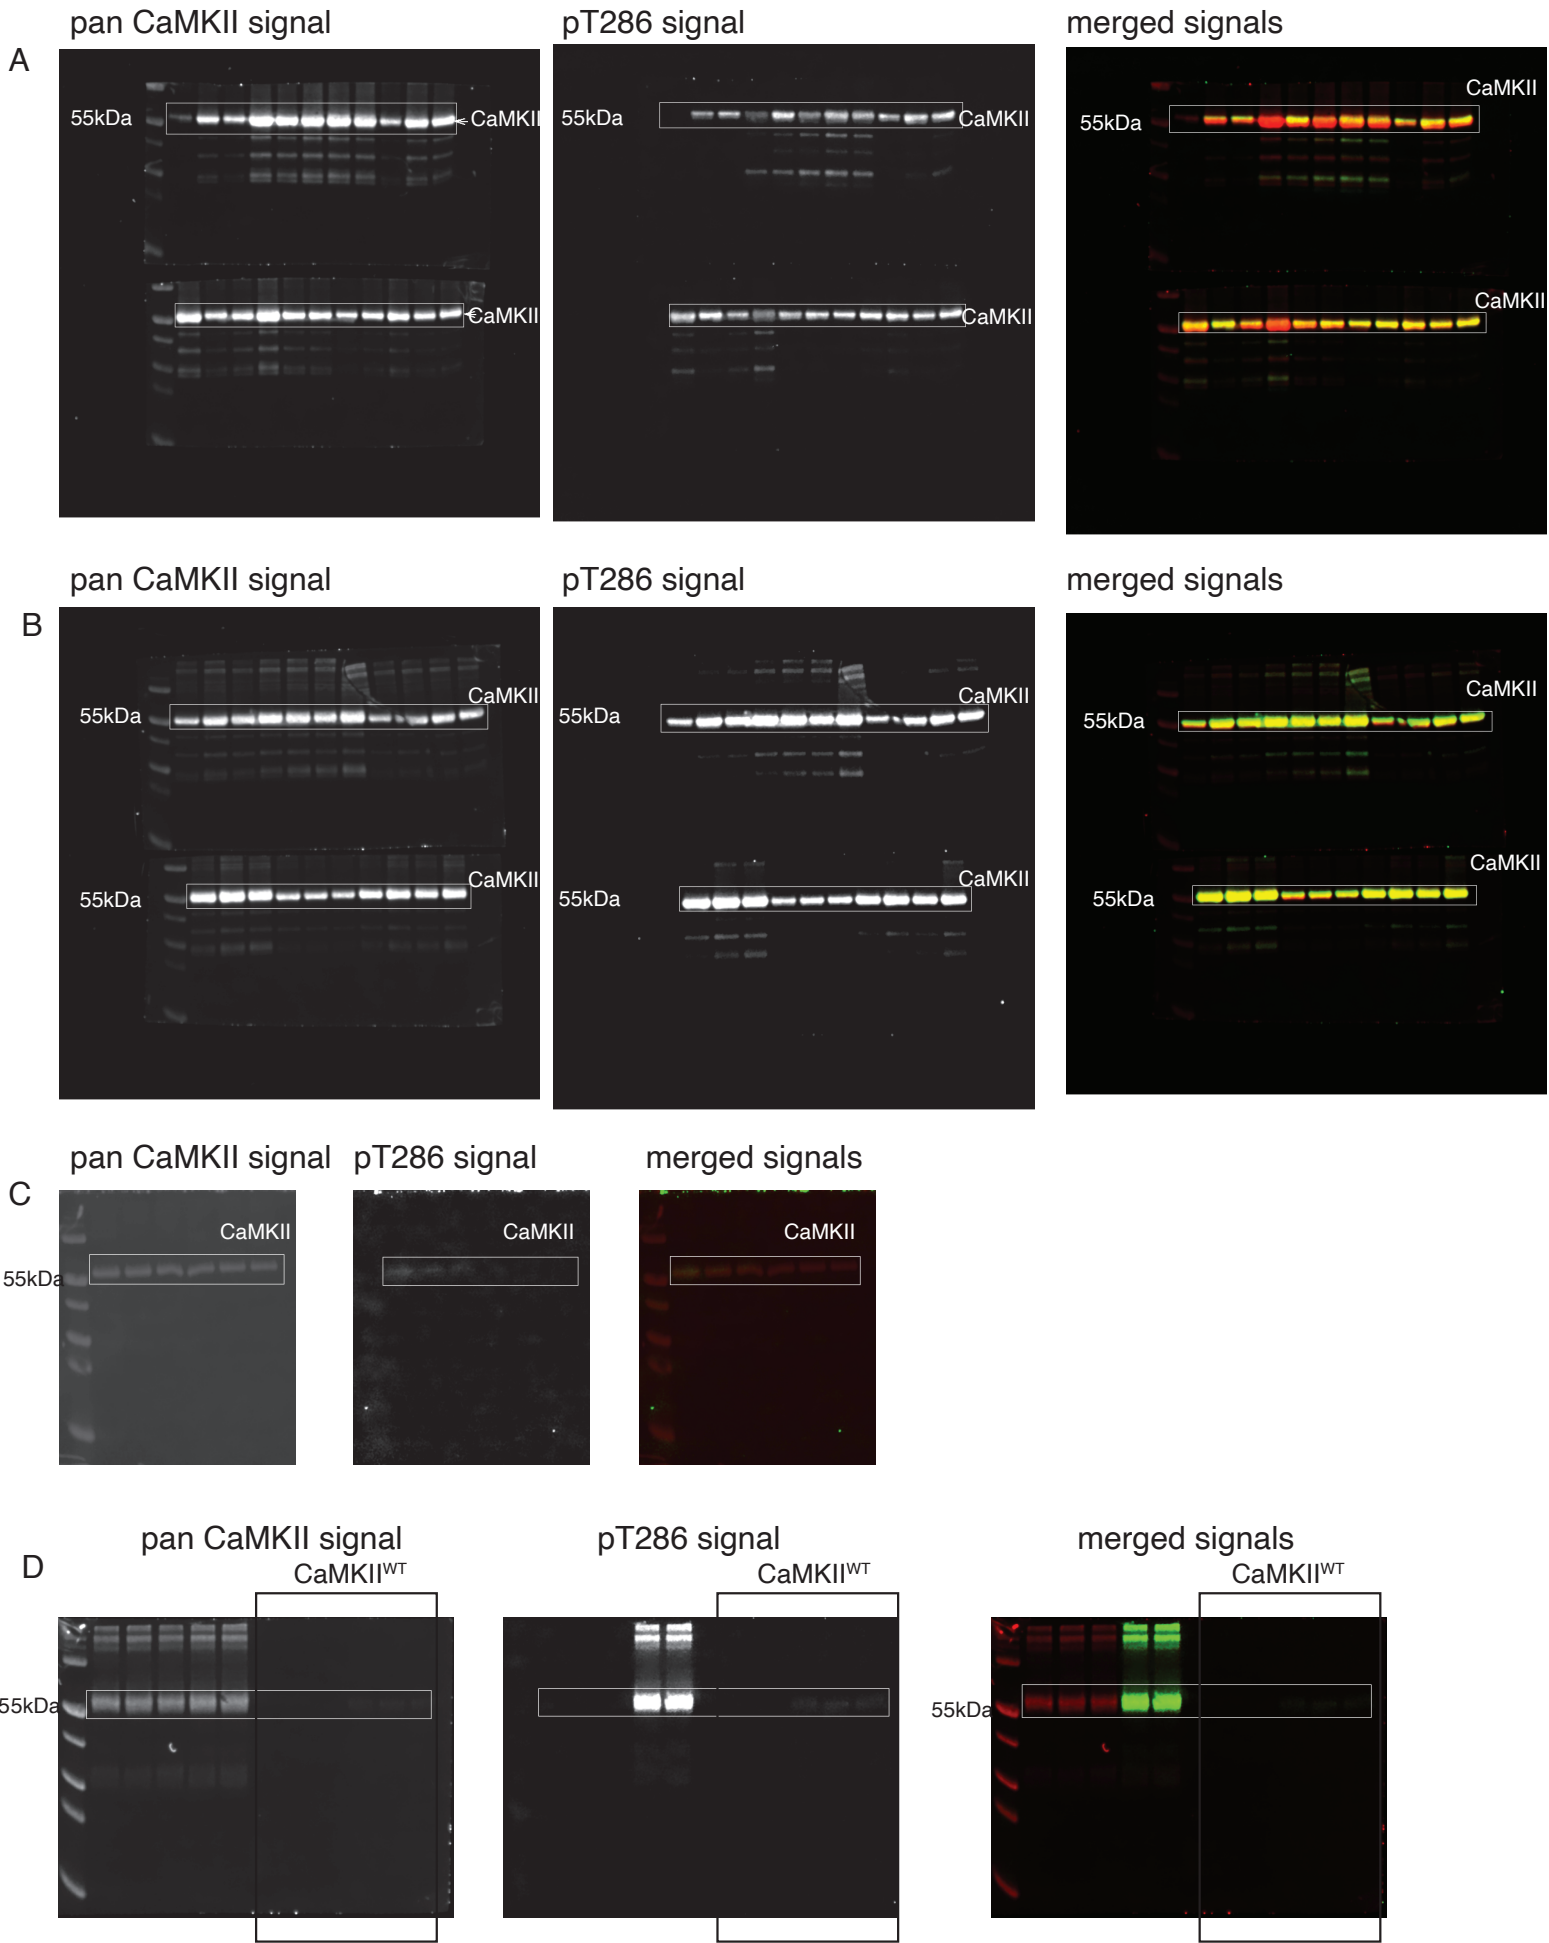

Supplement: fig1-figsupp1-data1 [file elife-86090-fig1-figsupp1-data1-v2.zip]

Figure 1 - figure supplemet 2 gels

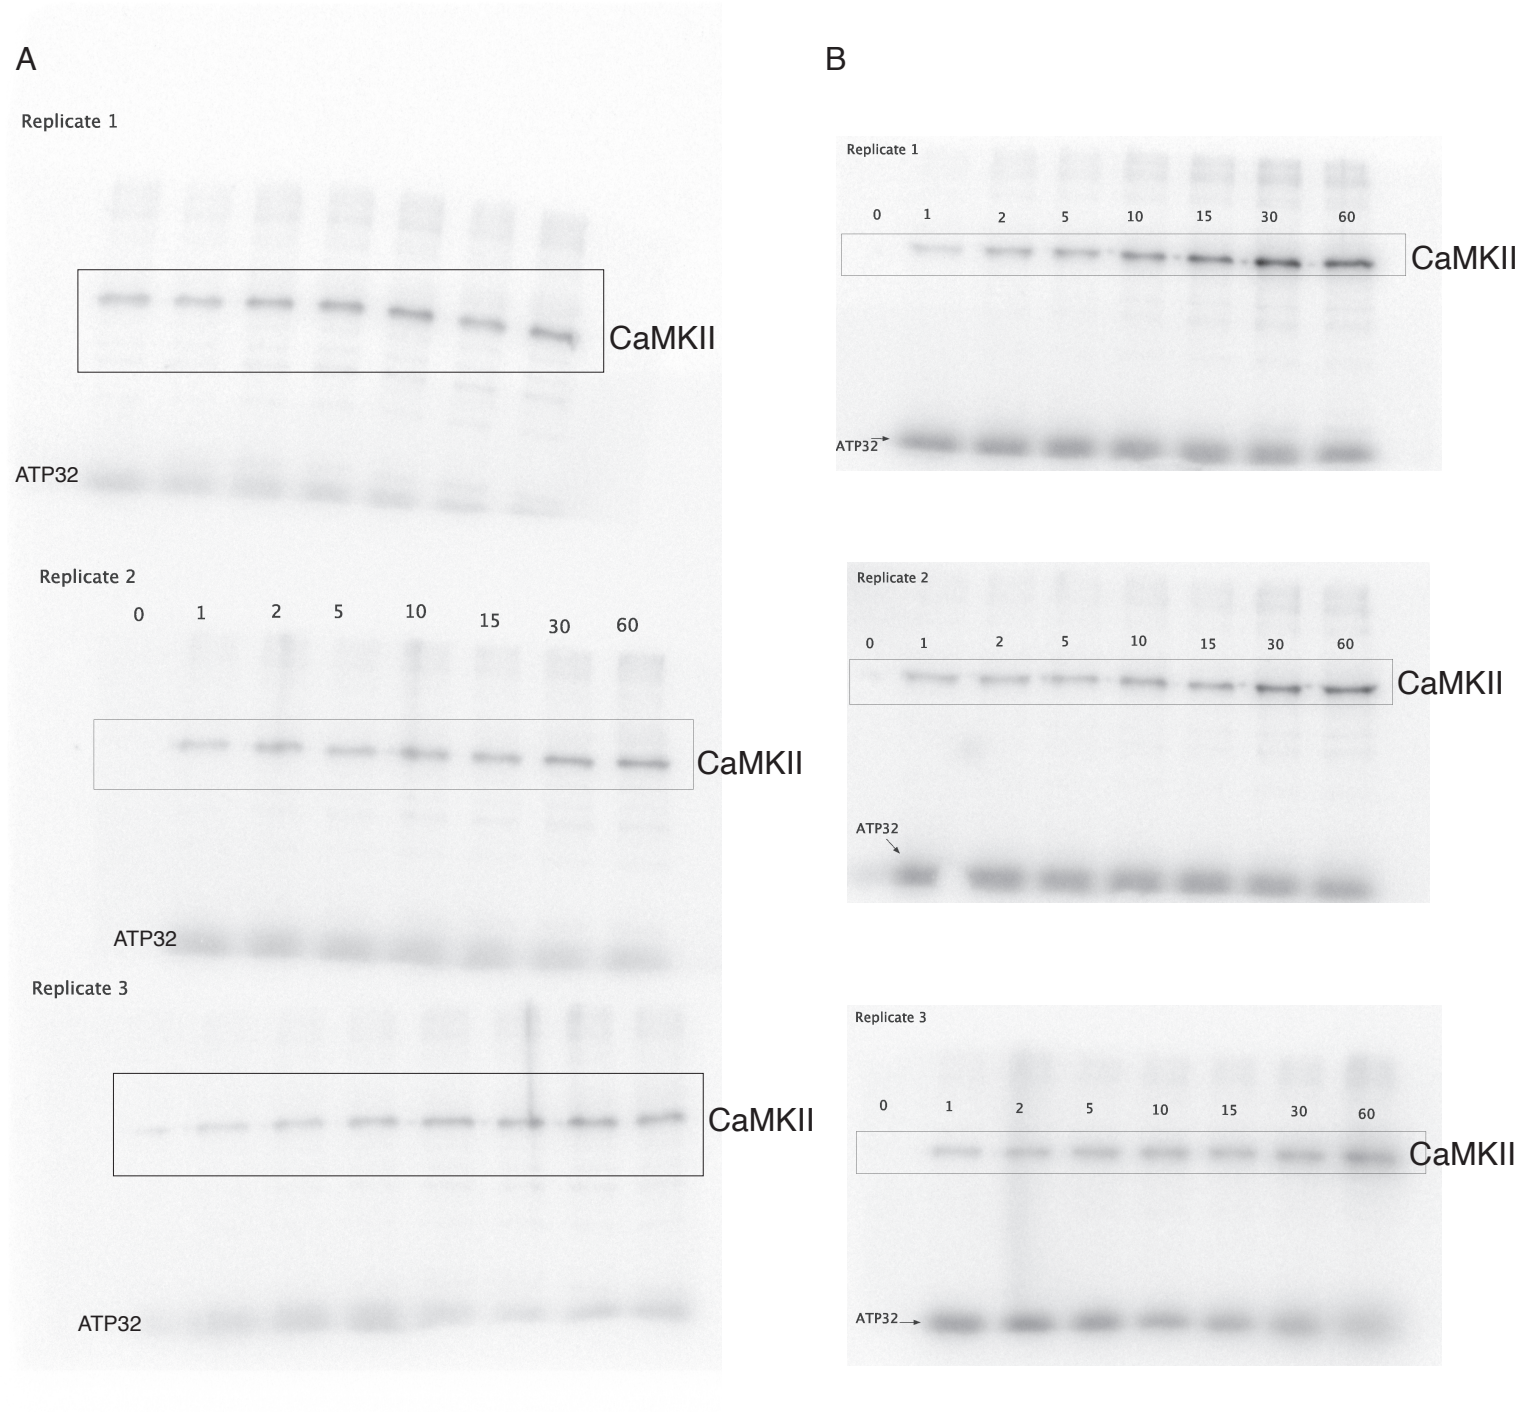

Supplement: fig1-figsupp2-data1 [file elife-86090-fig1-figsupp2-data1-v2.zip]

Figure 1 - figure supplement 3 blots

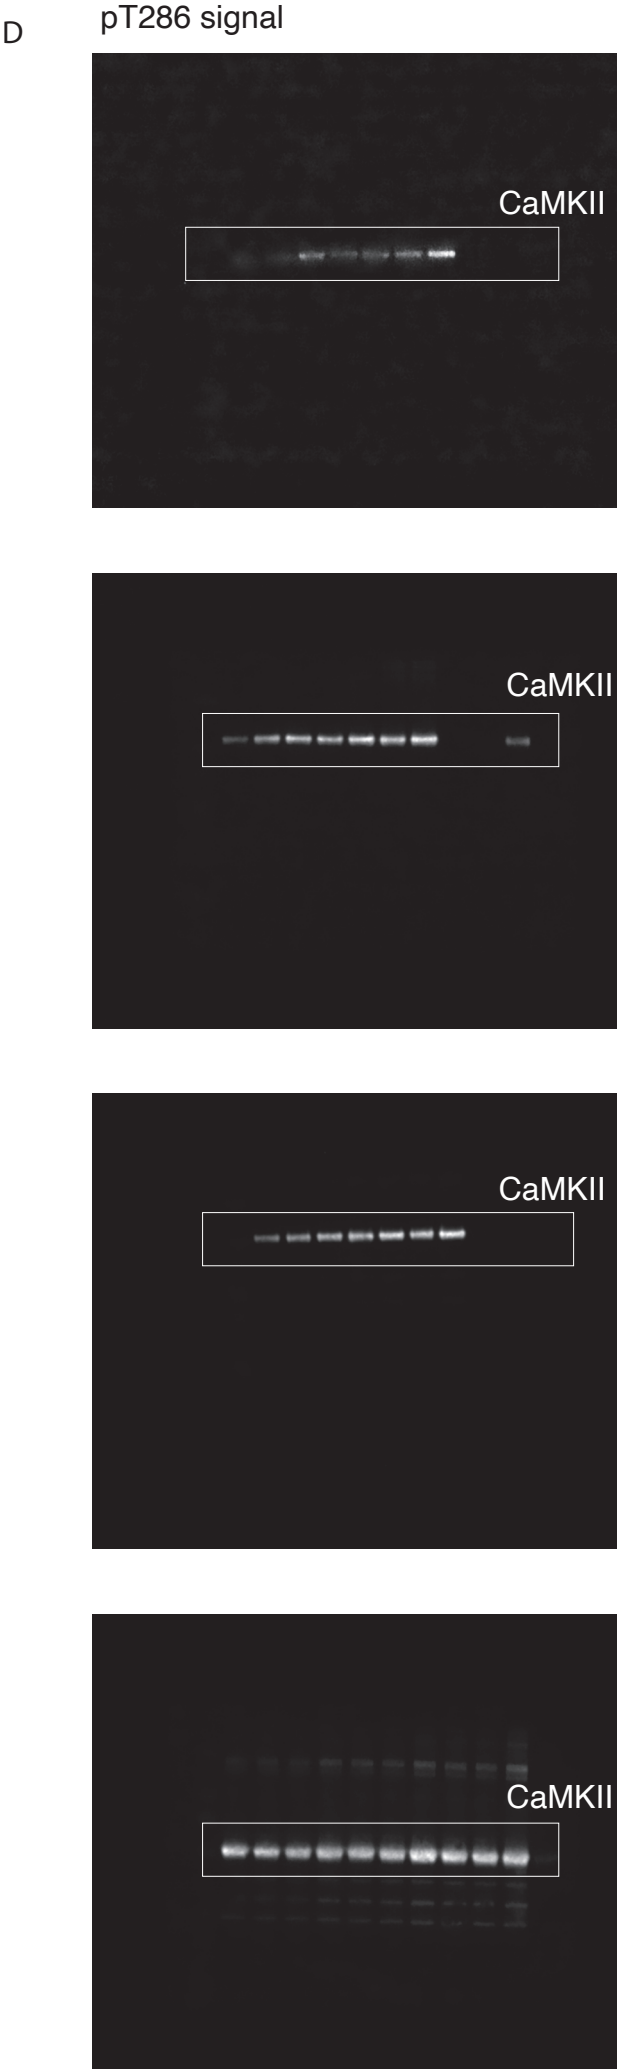

Supplement: fig1-figsupp3-data1 [file elife-86090-fig1-figsupp3-data1-v2.zip]

Figure 1 - figure supplement 4 blots

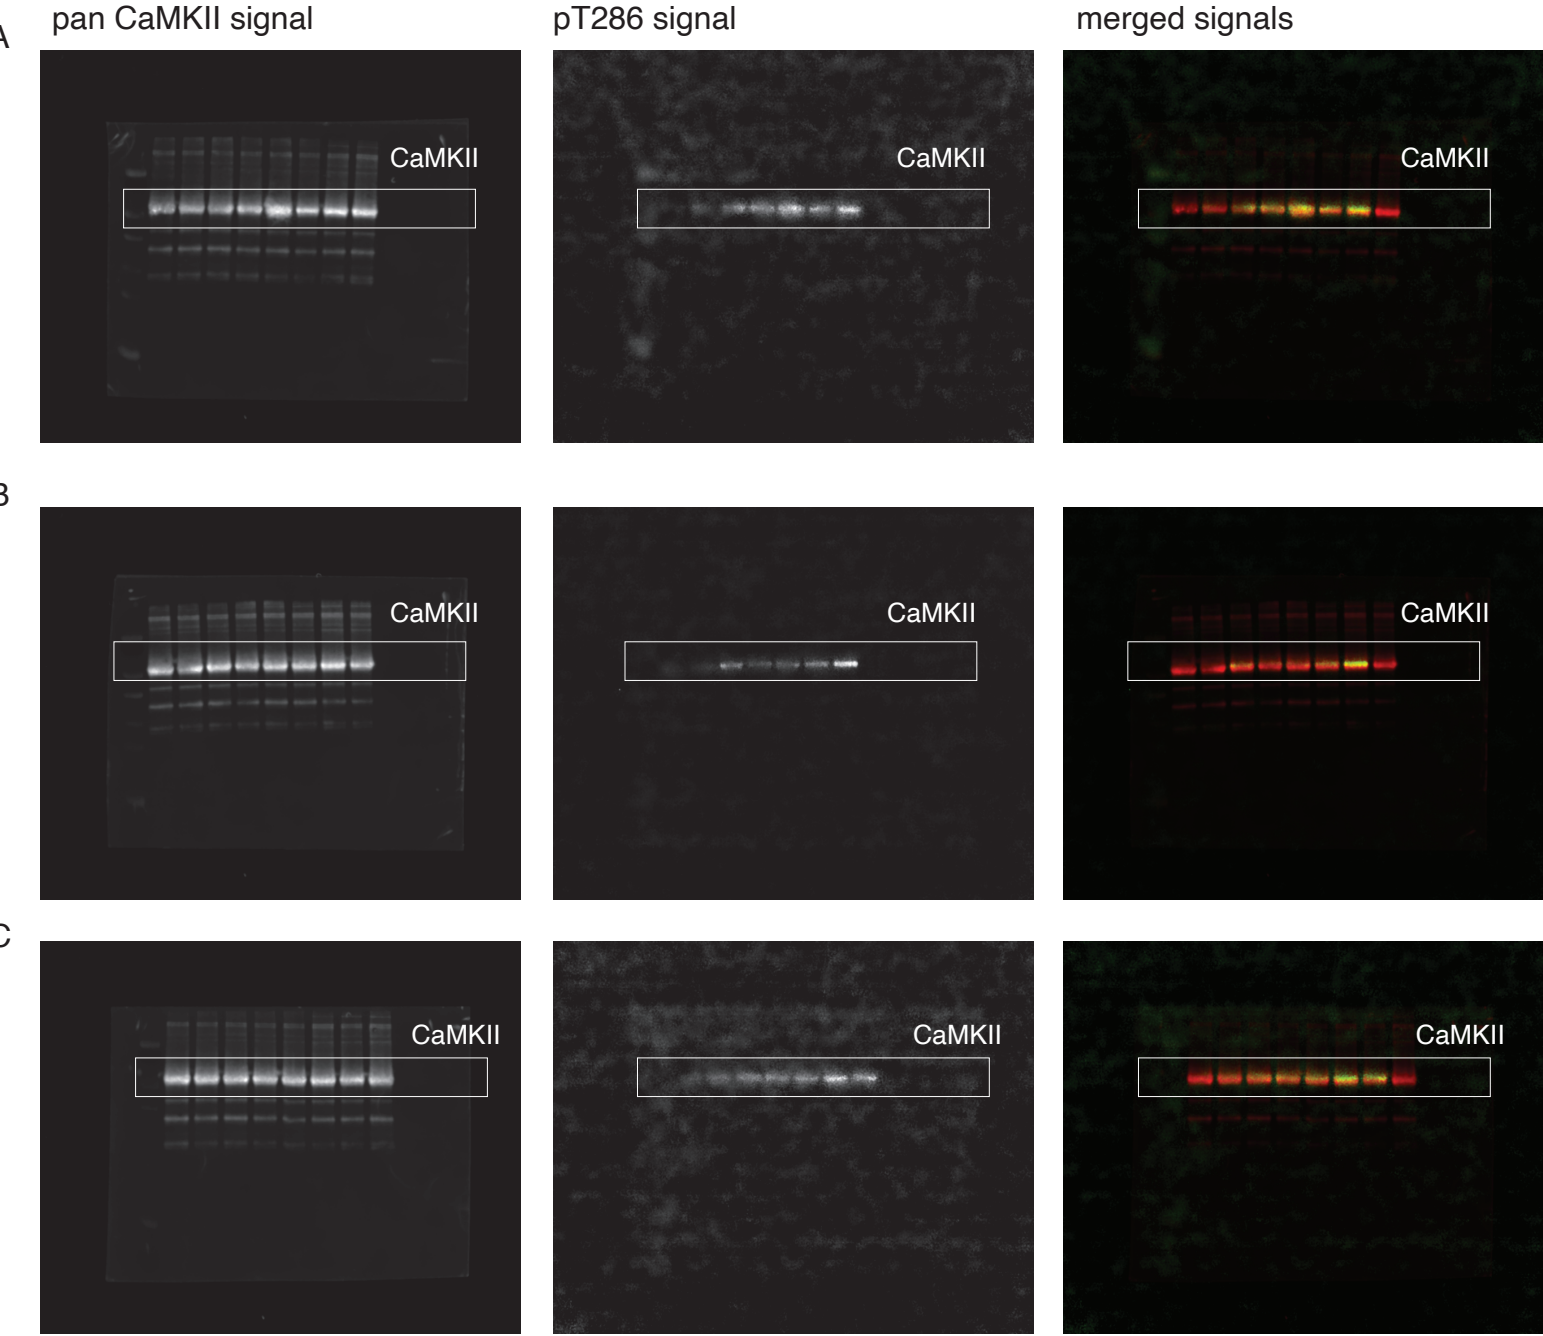

Supplement: fig1-figsupp4-data1 [file elife-86090-fig1-figsupp4-data1-v2.zip]

Figure 1 - figure supplement 5 blots

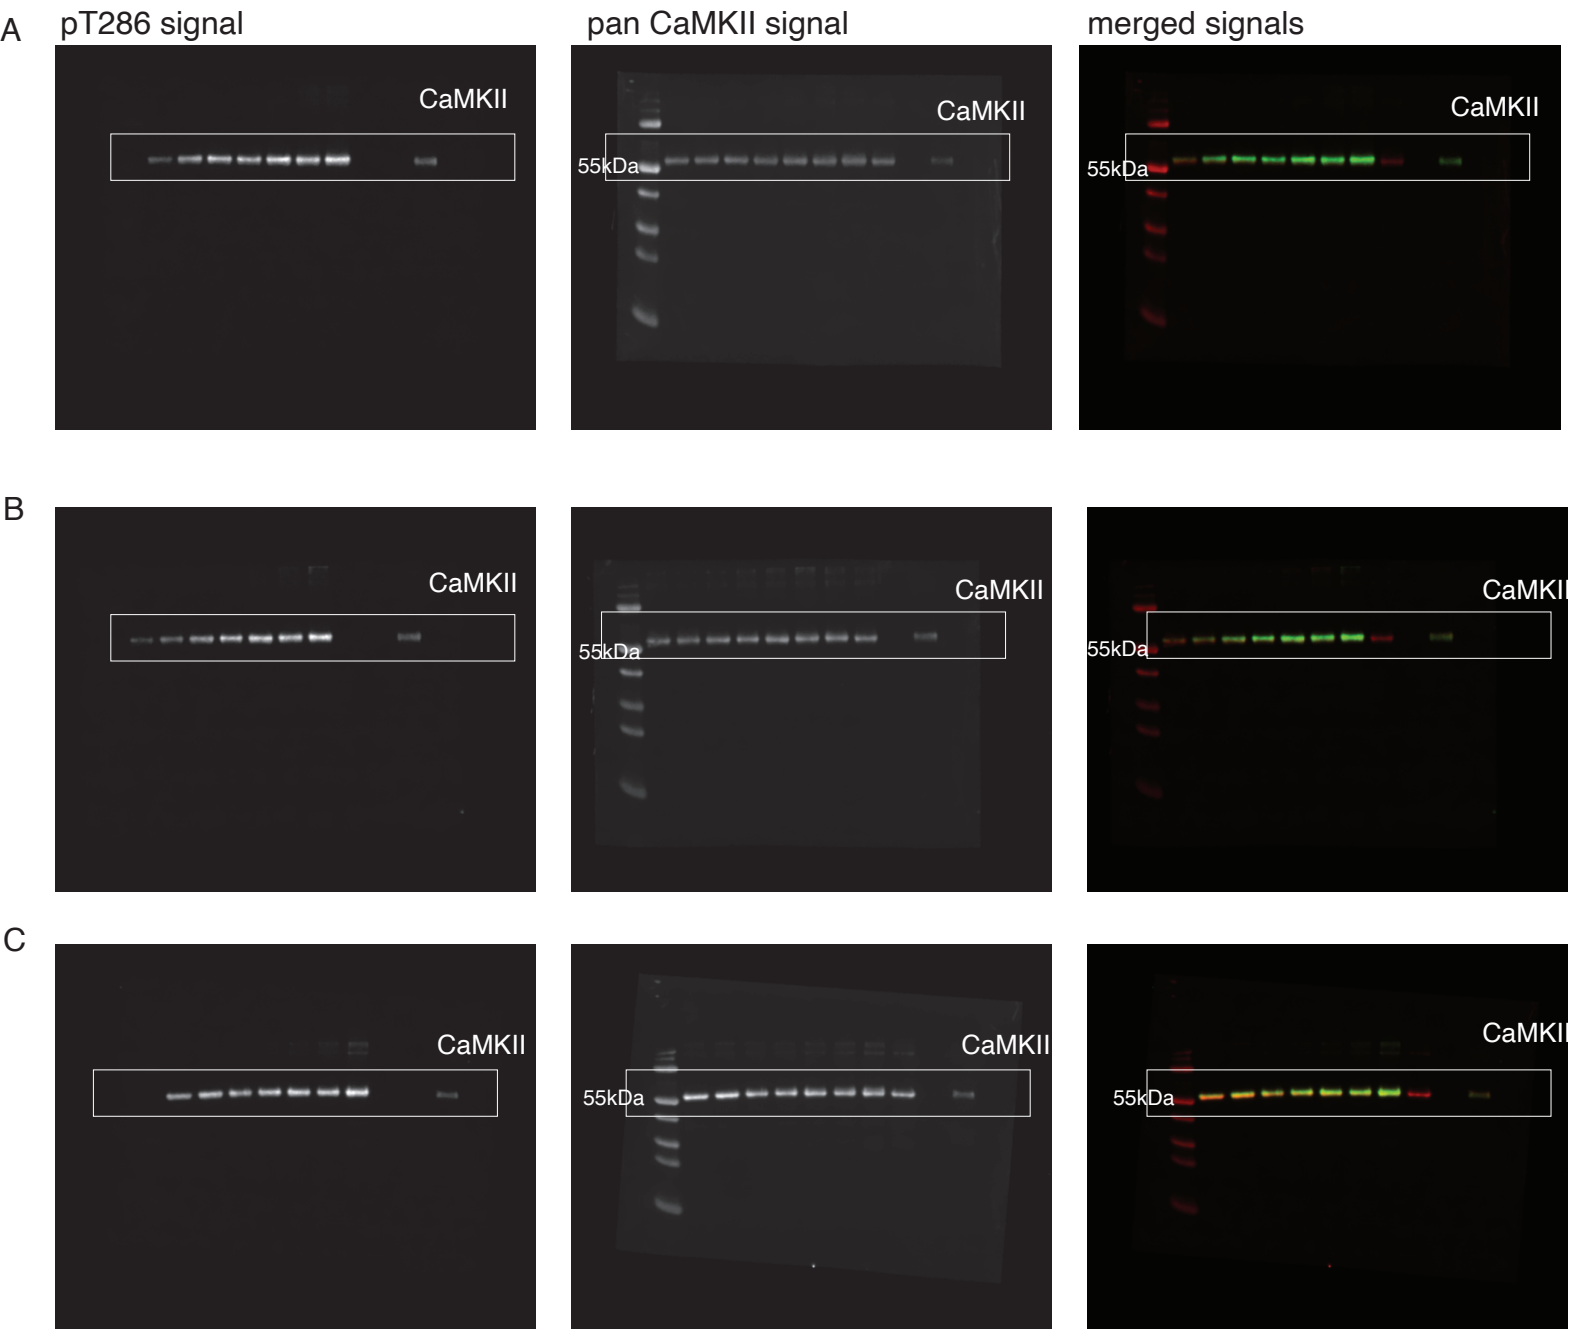

Supplement: fig1-figsupp5-data1 [file elife-86090-fig1-figsupp5-data1-v2.zip]

Figure 1-figure supplement 6 blots

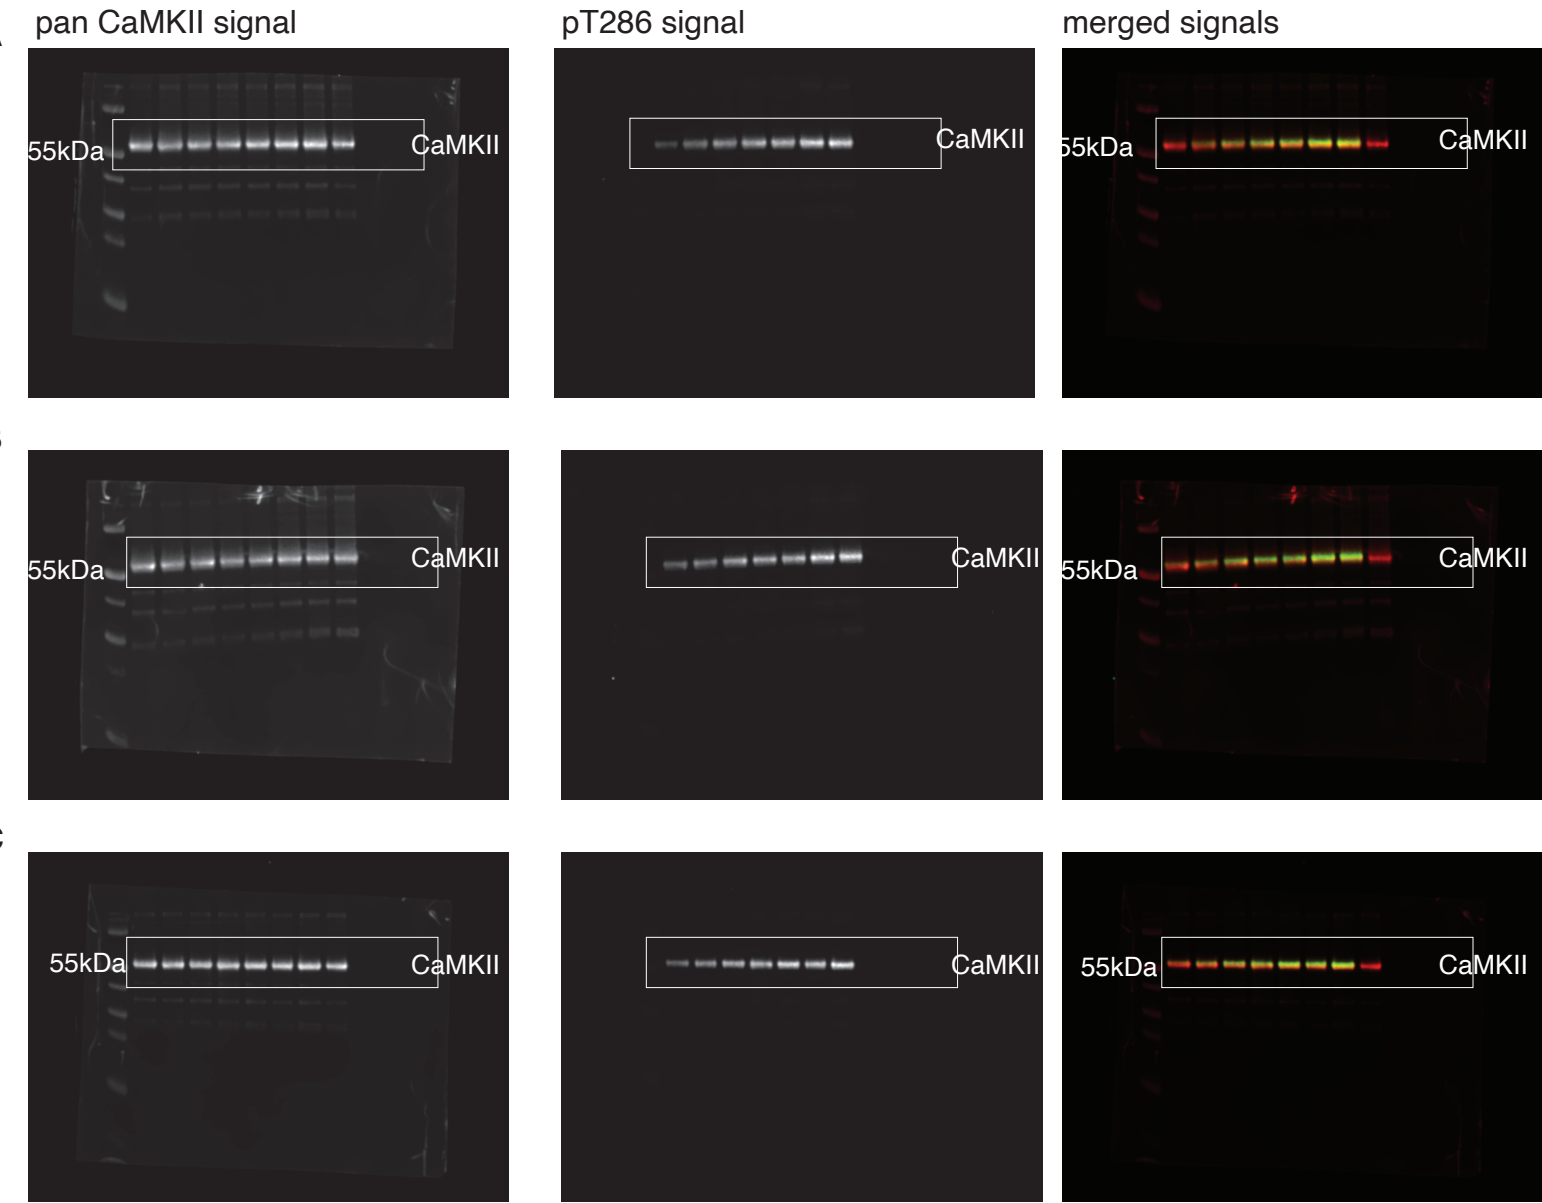

Supplement: fig1-figsupp6-data1 [file elife-86090-fig1-figsupp6-data1-v2.zip]

Figure 1-figure supplement 7 blots

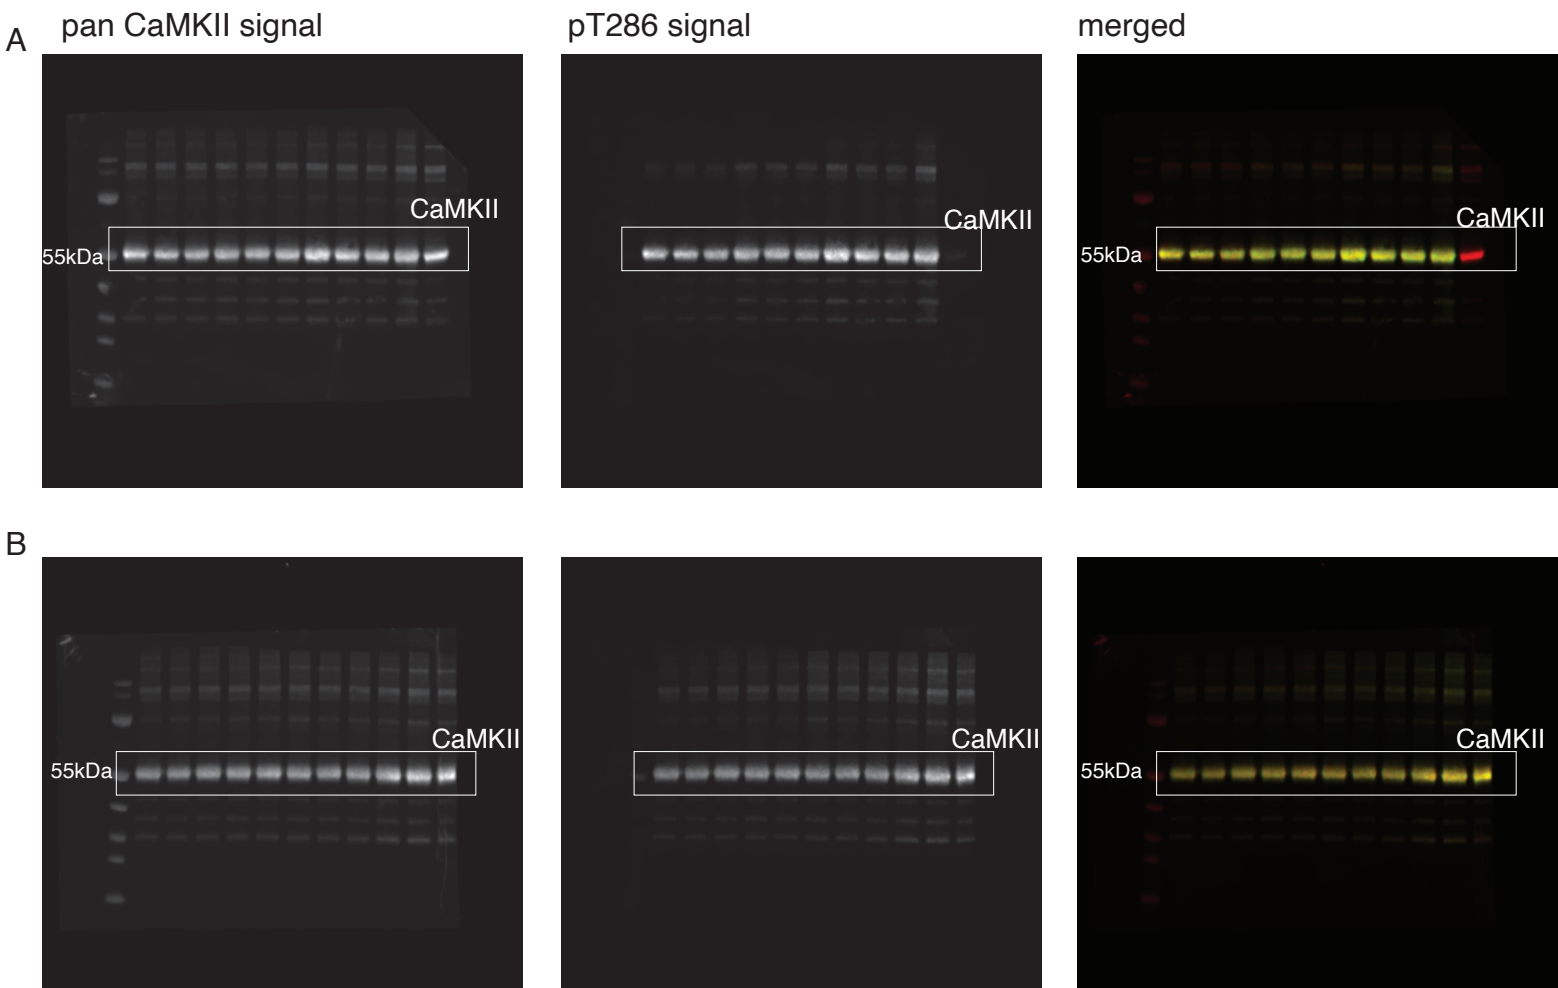

Supplement: fig1-figsupp7-data1 [file elife-86090-fig1-figsupp7-data1-v2.zip]

Figure 2B

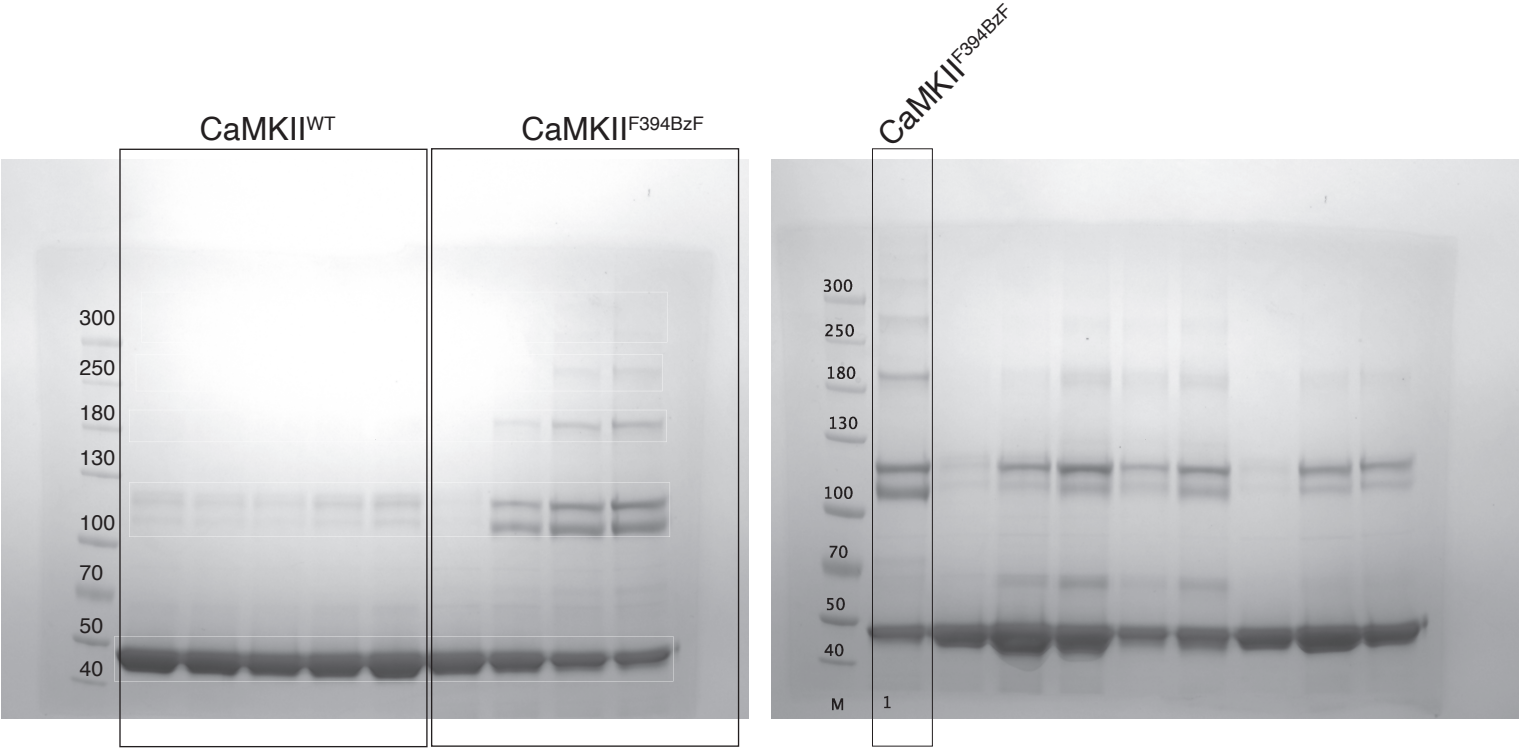

Supplement: fig2-data1 [file elife-86090-fig2-data1-v2.zip]

Figure 2-figure supplement 1 gels

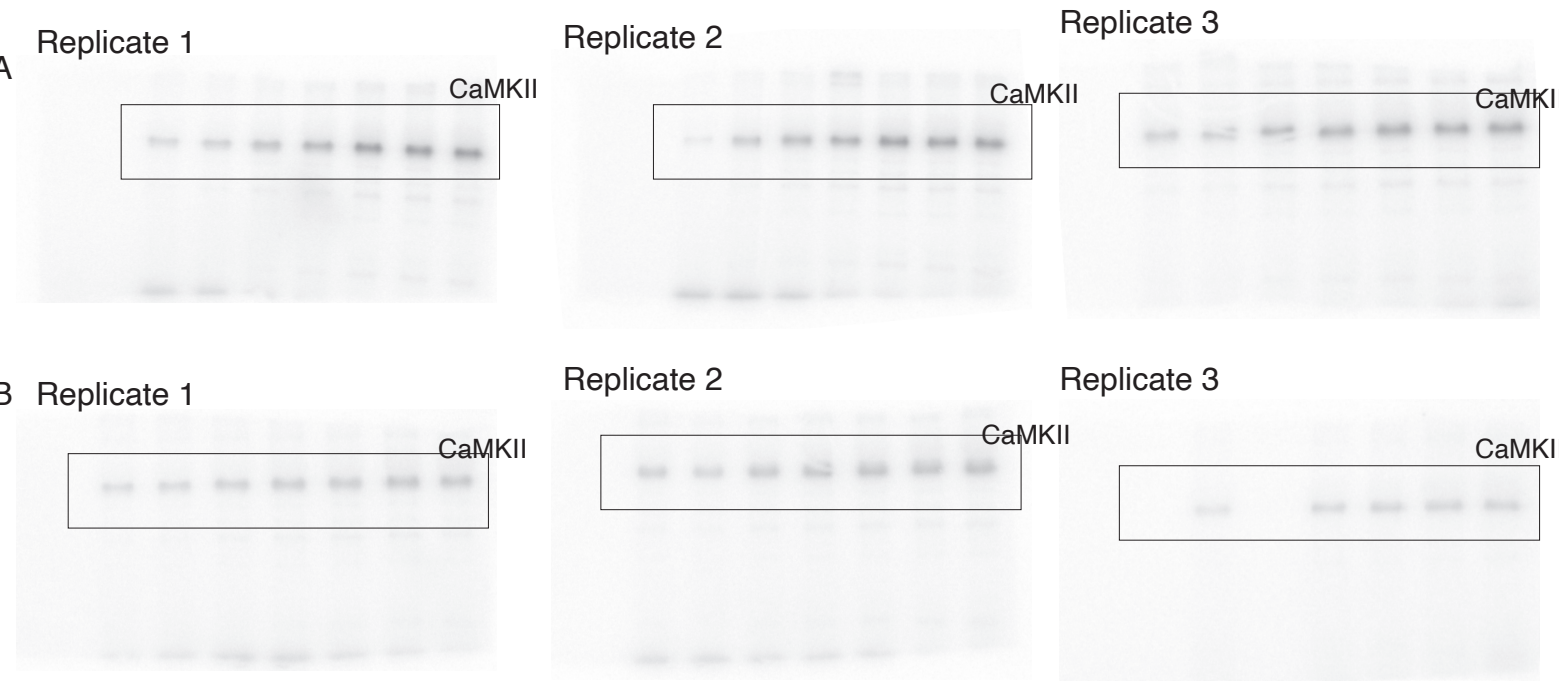

Supplement: fig2-figsupp1-data1 [file elife-86090-fig2-figsupp1-data1-v2.zip]

Figure 2-figure supplement 2 gels

A

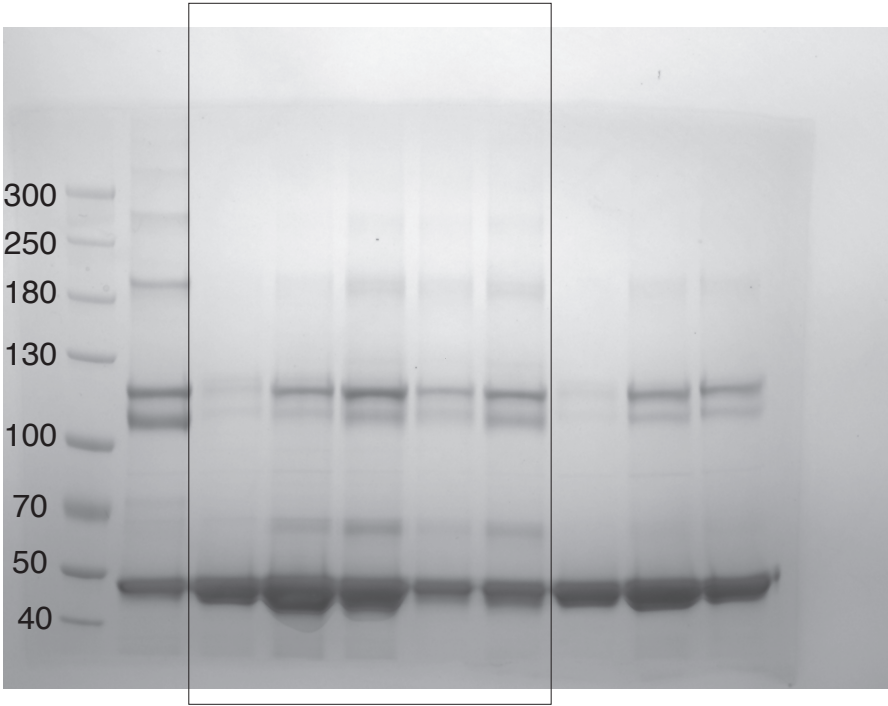

B

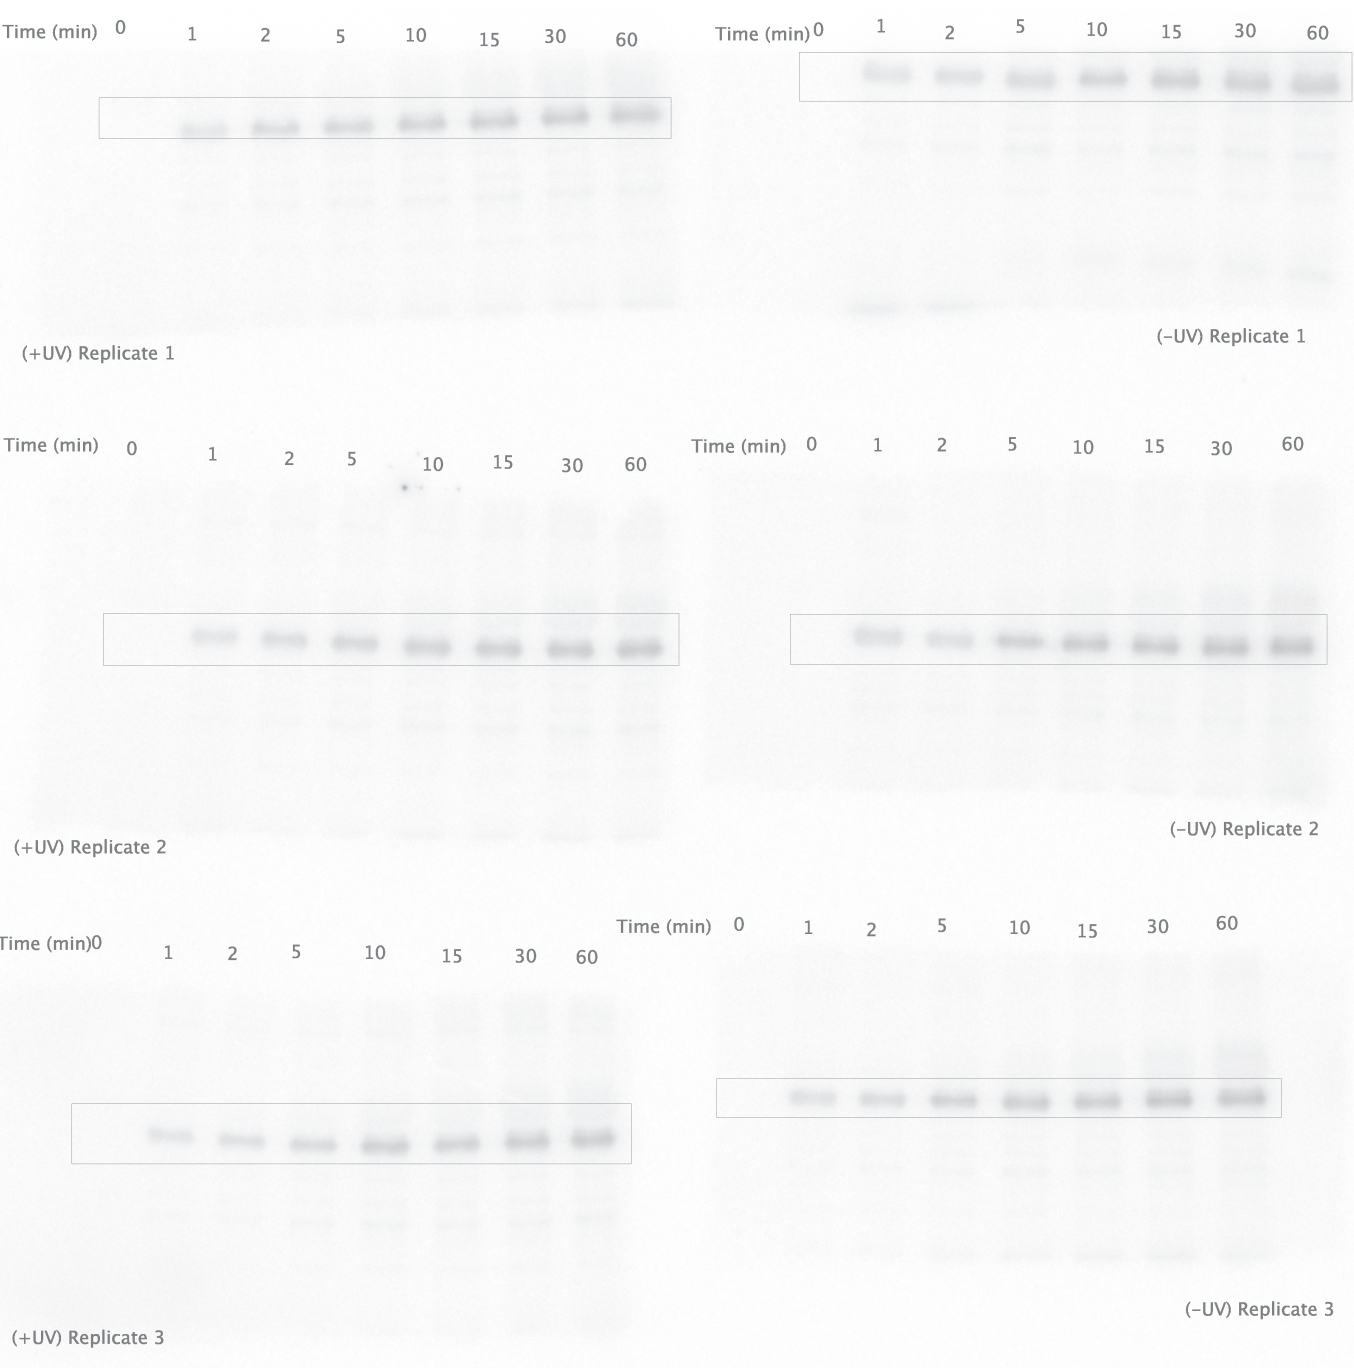

Supplement: fig2-figsupp2-data1 [file elife-86090-fig2-figsupp2-data1-v2.zip]

Figure 2-figure supplement 3 gels

A

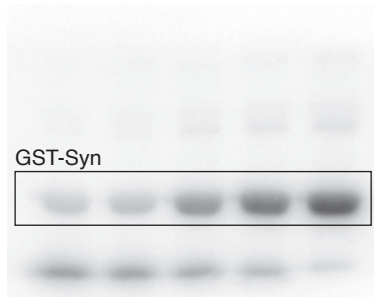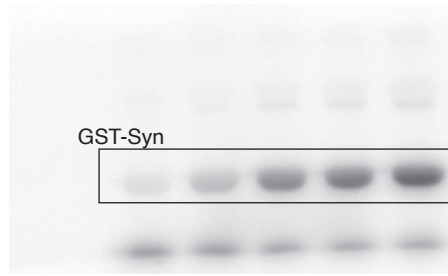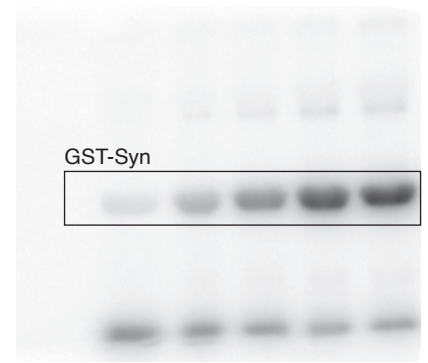

B

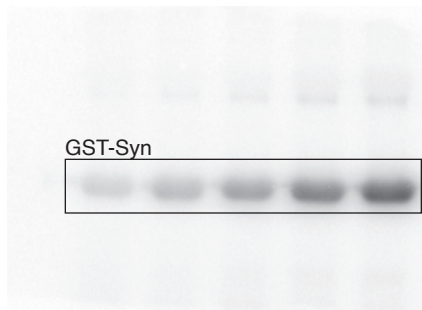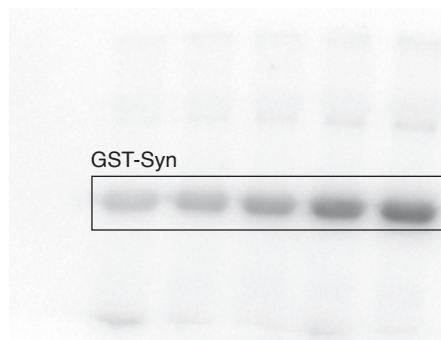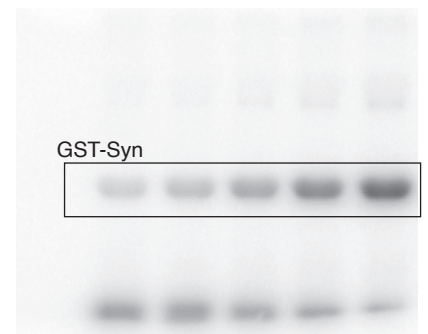

Supplement: fig2-figsupp3-data1 [file elife-86090-fig2-figsupp3-data1-v2.zip]

Figure 3B

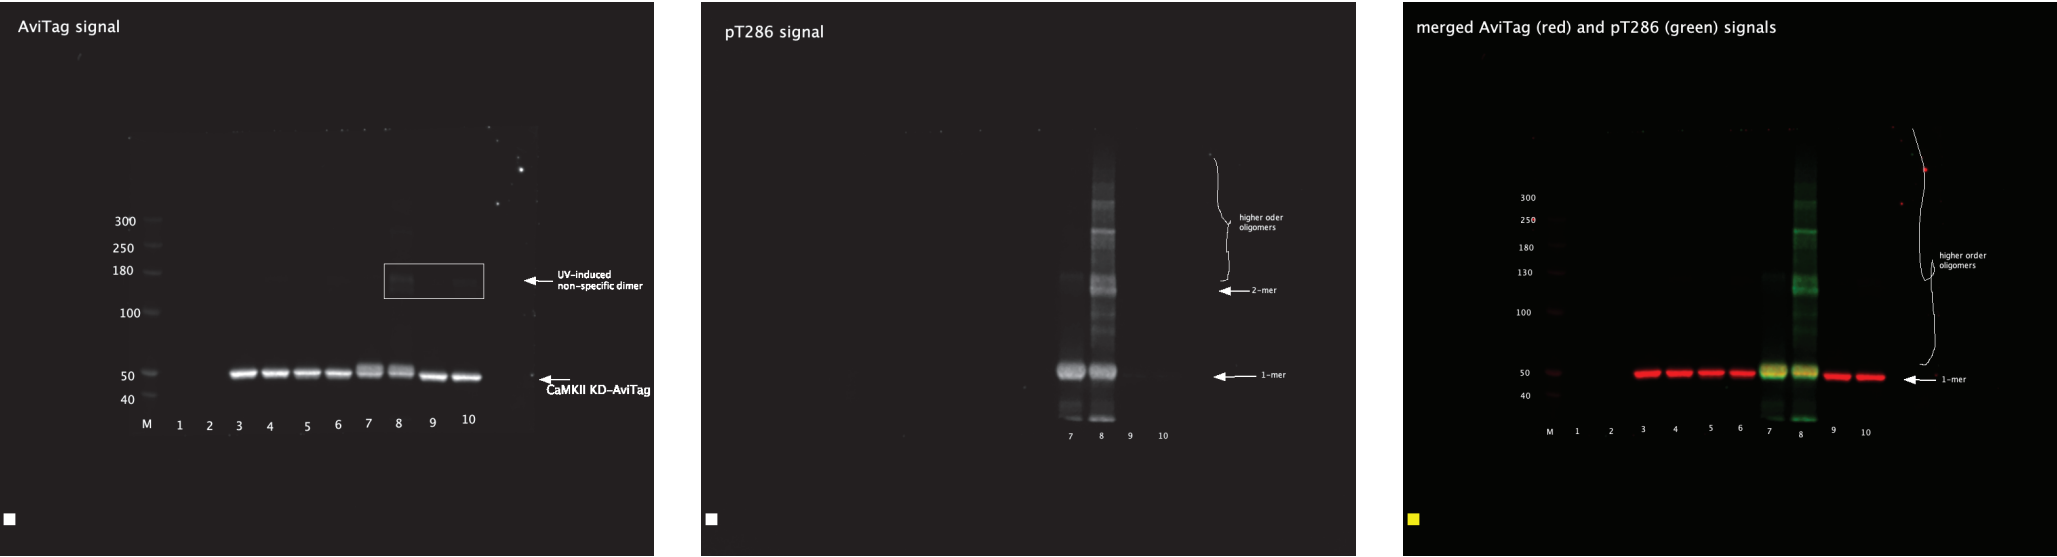

Supplement: fig3-data1 [file elife-86090-fig3-data1-v2.zip]

Figure 3-figure supplement 1 gels and blots

A

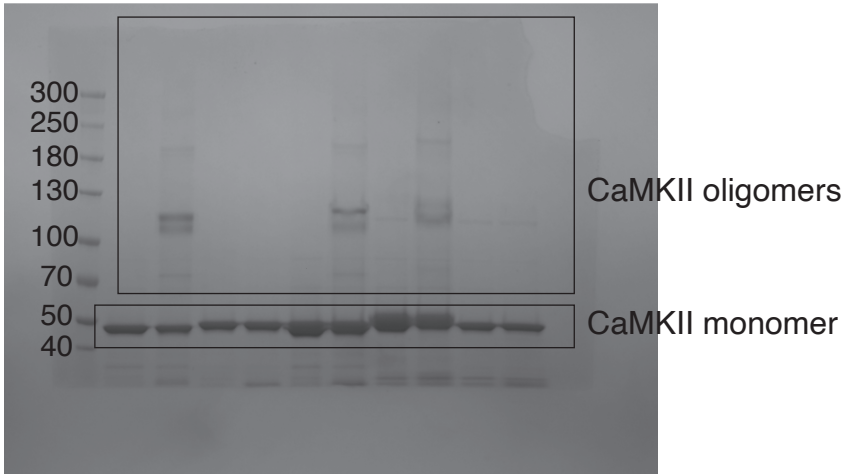

B AviTag signal

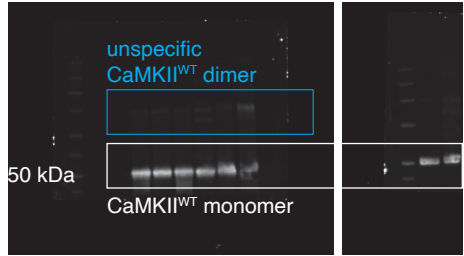

pT286 signal

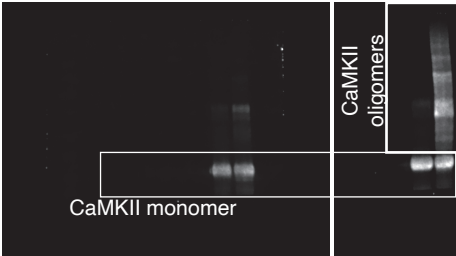

merged signals

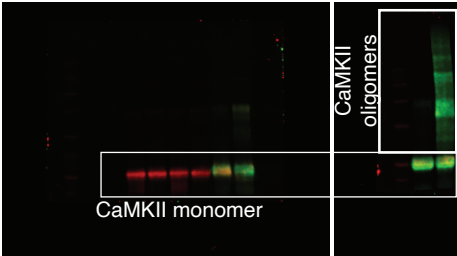

C

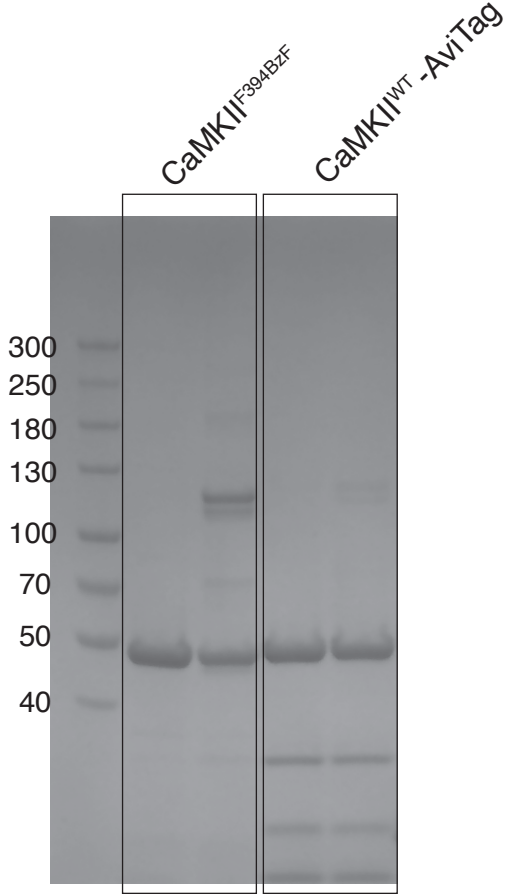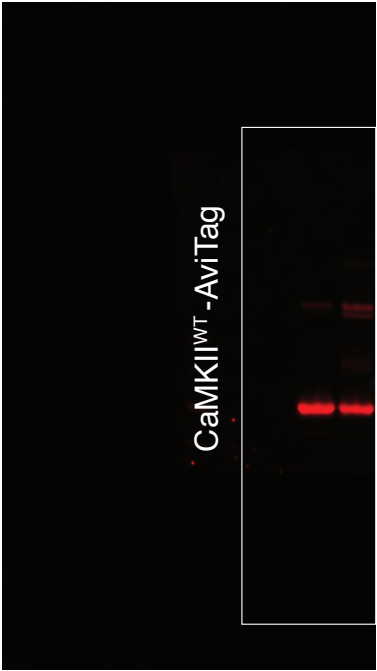

Supplement: fig3-figsupp1-data1 [file elife-86090-fig3-figsupp1-data1-v2.zip]

Figure 7-figure supplement 2 blots

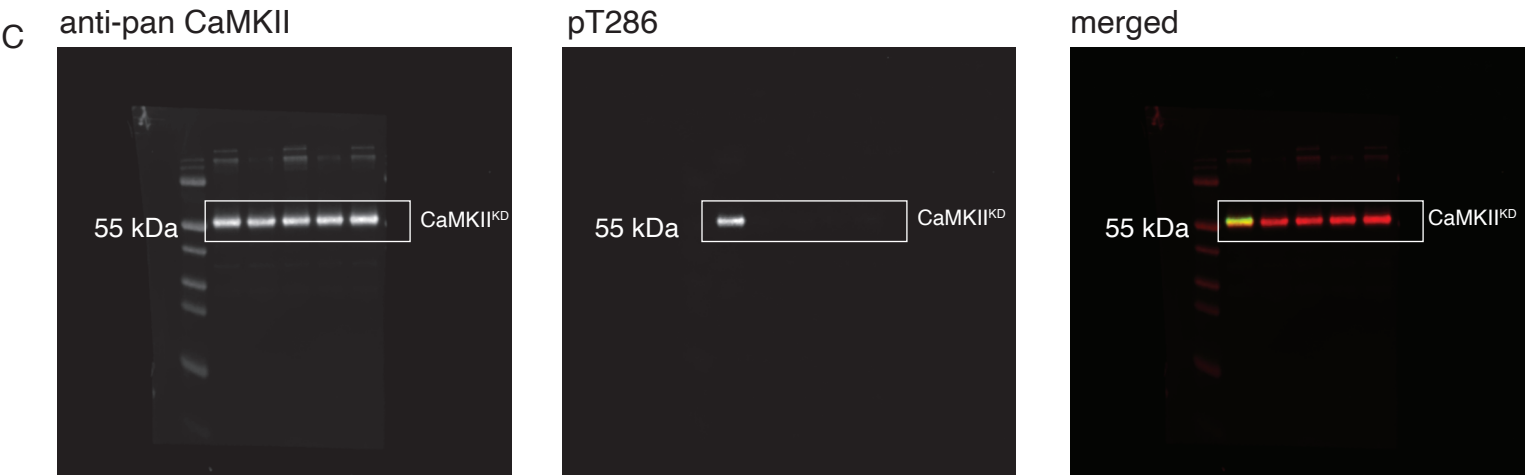

Supplement: fig7-figsupp2-data1 [file elife-86090-fig7-figsupp2-data1-v2.zip]
